# Supplementary material for: Early Pregnancy Maternal Plasma Phospholipid Saturated Fatty Acids and Fetal Growth: Findings from a Multi-Racial/Ethnic Birth Cohort in US
Source: MDPI journal article supplement (doi:10.3390/nu15153287), 2023-07-25
Supplement: s1 [file s1]

**Supplementary Table S1. Individual fatty acid in weight percentage (%) of the total plasma phospholipid FA fraction**

| Fatty acids                                 | % of total plasma phospholipid FAs<br>Mean, SD |
|---------------------------------------------|------------------------------------------------|
| <b>SFAs</b>                                 |                                                |
| myristic acid (14:0)                        | 0.31 ± 0.08                                    |
| pentadecanoic acid (15:0)                   | 0.25 ± 0.07                                    |
| palmitic acid (16:0)                        | 27.45 ± 1.62                                   |
| heptadecanoic acid (17:0)                   | 0.43 ± 0.73                                    |
| stearic acid (18:0)                         | 12.72 ± 1.21                                   |
| eicosanoic acid (20:0)                      | 0.29 ± 0.10                                    |
| docosanoic acid (22:0)                      | 0.74 ± 0.32                                    |
| tetracosanoic acid (24:0)                   | 0.56 ± 0.20                                    |
| <b>MUFAs</b>                                |                                                |
| palmitoleic acid (16:1n7)                   | 0.54 ± 0.20                                    |
| petroselinic acid (18:1n6)                  | 0.20 ± 0.08                                    |
| vacenic acid (18:1n7)                       | 1.38 ± 0.20                                    |
| oleic acid (18:1n9)                         | 7.34 ± 0.90                                    |
| gondoic acid (20:1n9)                       | 0.14 ± 0.07                                    |
| vervonic acid (24:1n9)                      | 1.04 ± 0.47                                    |
| <b>PUFAs</b>                                |                                                |
| alpha-linolenic acid (ALA; 18:3n3)          | 0.22 ± 0.07                                    |
| eicosapentaenoic acid (EPA; 20:5n3)         | 0.33 ± 0.18                                    |
| n-3 docosapentaenoic acid (DPA; 22:5n3)     | 0.69 ± 0.21                                    |
| docosahexaenoic acid (DHA; 22:6n3)          | 4.24 ± 1.25                                    |
| linolenic acid (LA;18:2n6)                  | 20.40 ± 2.73                                   |
| gamma-linolenic acid (GLA; 18:3n6)          | 0.08 ± 0.03                                    |
| eicosadienoic acid (EDA; 20:2n6)            | 0.51 ± 0.10                                    |
| dihomo-gamma-linolenic acid (DGLA; 20:3n6)  | 3.58 ± 0.92                                    |
| arachidonic acid (AA; 20:4n6)               | 11.21 ± 2.08                                   |
| docosatetraenoic acid (DTA; 22:4n6)         | 0.49 ± 0.20                                    |
| n-6 docosapentaenoic acid (n-6 DPA; 22:5n6) | 0.54 ± 0.21                                    |

**Supplementary Table S2. Numbers in different ultrasound schedule groups among 321 subjects**

| <b>Ultrasound<br/>schedule,</b> | <b>GDM group</b> | <b>Non-GDM group</b> | <b>Total number</b> | <b>Total</b> |
|---------------------------------|------------------|----------------------|---------------------|--------------|
| Group A                         | 28               | 56                   | 84                  |              |
| Group B                         | 35               | 70                   | 105                 |              |
| Group C                         | 24               | 48                   | 72                  |              |
| Group D                         | 20               | 40                   | 60                  | 321          |

**Supplementary Table S3. Maternal characteristics according to weighting**

| Maternal characteristics             | Overall (n=2802) | Fetal growth study (n=321) |                          |
|--------------------------------------|------------------|----------------------------|--------------------------|
|                                      |                  | Non-weighted               | Weighted                 |
|                                      | n (%)            | n (%)                      | Mean percentage (95% CI) |
| Age, years                           |                  |                            |                          |
| <25                                  | 805 (28.7%)      | 54 (16.8%)                 | 30.0 (21.6, 38.4)%       |
| 25-29                                | 821 (29.3%)      | 85 (26.5%)                 | 29.7 (22.7, 36.7)%       |
| 30-34                                | 788 (28.1%)      | 97 (30.2%)                 | 25.8 (19.6, 31.9)%       |
| ≥ 35                                 | 388 (13.8%)      | 85 (26.5%)                 | 14.5 (10.5, 18.5)%       |
| Race/ethnicity                       |                  |                            | %                        |
| Non-Hispanic White                   | 751 (26.8)       | 75 (23.4%)                 | 30.9 (23.3, 38.6)%       |
| Non-Hispanic Black                   | 781 (27.9)       | 45 (14.0%)                 | 23.3 (15.6, 31.0)%       |
| Hispanic                             | 803 (28.7)       | 123 (38.3%)                | 27.2 (21.2, 33.2)%       |
| Asian/Pacific Islander               | 467 (16.7)       | 78 (24.3%)                 | 18.5 (13.4, 23.7)%       |
| Pre-pregnancy BMI, kg/m <sup>2</sup> |                  |                            |                          |
| <25.0                                | 1567 (55.9%)     | 156 (48.6%)                | 51.7 (43.9, 59.6)%       |
| 25.0-29.9                            | 767 (27.4%)      | 99 (30.8%)                 | 33.1 (25.3, 40.8)%       |
| ≥ 30                                 | 453 (16.2%)      | 64 (19.9%)                 | 15.0 (9.83, 20.15)%      |
| Education                            |                  |                            |                          |
| Missing                              | 839 (29.9)       | 81 (25.2%)                 | 25.1 (17.8, 32.4)%       |
| Below college                        | 850 (30.3)       | 117 (36.4%)                | 35.2 (27.7, 42.7)%       |
| College degree and above             | 1111 (39.7)      | 123 (38.3%)                | 39.8 (32.3, 47.3)%       |
| Family history of diabetes, Yes      | 590 (21.1%)      | 88 (27.4%)                 | 20.4 (14.6, 26.3)%       |
| Married or co-habiting, Yes          | 2082 (74.3%)     | 259 (80.7%)                | 72.87 (65.18, 80.56)%    |
| Nulliparous, Yes                     | 1319 (47.1)      | 144 (44.9%)                | 51.1 (43.3, 58.9)%       |
| GDM diagnosis, Yes                   | 107 (3.8)        | 107 (33.3%)                | 3.9 (2.9, 4.8)%          |
| Gestational weeks at delivery        |                  |                            |                          |
| <37 weeks                            | 159 (5.7%)       | 22 (6.9%)                  | 9.12 (3.61, 14.6)%       |
| 37-39 weeks                          | 1540 (55.0%)     | 204 (63.6%)                | 56.1 (48.2, 64.1)%       |
| ≥ 40 weeks                           | 858 (30.6%)      | 93 (29.0%)                 | 34.7 (27.1, 42.4)%       |
| Fetal sex, Male                      | 1309 (46.7%)     | 166 (51.7%)                | 51.5 (43.6, 59.4)%       |
| Birth weight, g                      |                  |                            |                          |
| ≤ 2500                               | 131 (4.7%)       | 14 (4.4%)                  | 6.75 (1.76, 11.7)%       |
| 2501-3999                            | 2228 (79.5%)     | 274 (85.4%)                | 87.2 (81.5, 92.9)%       |
| ≥ 4000                               | 192 (6.9%)       | 30 (9.3%)                  | 6.03 (2.79, 9.26)%       |
| SGA, Yes                             | 221 (7.9%)       | 13 (4.0%)                  | 4.65 (1.94, 7.36)%       |
| LGA, Yes                             | 223 (8.0%)       | 34 (10.6%)                 | 7.13 (3.38, 10.9)%       |
| Delivery mode,                       |                  |                            |                          |
| Vaginal delivery                     | 1810 (64.6%)     | 203 (63.2%)                | 62.4 (54.5, 70.3)%       |
| C-section                            | 750 (26.8%)      | 116 (36.1%)                | 37.6 (29.7, 45.5)%       |

Abbreviations: BMI, Body mass index; GDM, gestational diabetes mellitus; SGA, smaller than gestational age; LGA, larger than gestational age.

**Supplementary Table S4A. Association between individual SFA and fetal growth biometrics (EFW, AC & FL) throughout between 10-40 weeks gestation**

| SFAs in tertiles          | Estimated fetal growth (EFW), g                                                                                        |                  |                                    |                       | Abdominal circumference (AC), mm                                                                                       |                  |                                    |                       | Femur length (FL), mm                                                                                                  |                  |                                    |                       |
|---------------------------|------------------------------------------------------------------------------------------------------------------------|------------------|------------------------------------|-----------------------|------------------------------------------------------------------------------------------------------------------------|------------------|------------------------------------|-----------------------|------------------------------------------------------------------------------------------------------------------------|------------------|------------------------------------|-----------------------|
|                           | Global test after adjusting for maternal age, ethnicity/race, nulliparity, pre-pregnancy body mass index and fetal sex |                  |                                    |                       | Global test after adjusting for maternal age, ethnicity/race, nulliparity, pre-pregnancy body mass index and fetal sex |                  |                                    |                       | Global test after adjusting for maternal age, ethnicity/race, nulliparity, pre-pregnancy body mass index and fetal sex |                  |                                    |                       |
|                           | Without interaction term SFA*GA                                                                                        |                  | With additional interaction SFA*GA |                       | Without interaction term SFA*GA                                                                                        |                  | With additional interaction SFA*GA |                       | Without interaction term PUFA*GA                                                                                       |                  | With additional interaction SFA*GA |                       |
|                           |                                                                                                                        |                  | likelihood ratio                   | Bonferroni correction |                                                                                                                        |                  | likelihood ratio                   | Bonferroni correction |                                                                                                                        |                  | likelihood ratio                   | Bonferroni correction |
|                           | Mean difference in log (SE)                                                                                            |                  | P value                            | P value               | Mean difference in log (SE)                                                                                            |                  | P value                            | P value               | Mean difference in log (SE)                                                                                            |                  | P value                            | P value               |
| Myristic acid (14:0)      | 1 <sup>st</sup> tertile                                                                                                | Reference        | <0.00001                           | <0.00001              | 1 <sup>st</sup> tertile                                                                                                | Reference        | <0.00001                           | <0.00001              | 1 <sup>st</sup> tertile                                                                                                | Reference        | <0.001                             | 0.012                 |
|                           | 2 <sup>nd</sup> tertile                                                                                                | -0.0221 (0.0222) |                                    |                       | 2 <sup>nd</sup> tertile                                                                                                | -0.0224 (0.0040) |                                    |                       | 2 <sup>nd</sup> tertile                                                                                                | -0.0152 (0.0201) |                                    |                       |
|                           | 3 <sup>rd</sup> tertile                                                                                                | -0.0269 (0.0236) |                                    |                       | 3 <sup>rd</sup> tertile                                                                                                | -0.0252 (0.0042) |                                    |                       | 3 <sup>rd</sup> tertile                                                                                                | -0.0202 (0.0213) |                                    |                       |
|                           | 4 <sup>th</sup> tertile                                                                                                |                  |                                    |                       | 4 <sup>th</sup> tertile                                                                                                |                  |                                    |                       | 4 <sup>th</sup> tertile                                                                                                |                  |                                    |                       |
| Pentadecanoic acid (15:0) | 1 <sup>st</sup> tertile                                                                                                | Reference        | <0.00001                           | <0.00001              | 1 <sup>st</sup> tertile                                                                                                | Reference        | <0.00001                           | <0.00001              | 1 <sup>st</sup> tertile                                                                                                | Reference        | <0.00001                           | 0.005                 |
|                           | 2 <sup>nd</sup> tertile                                                                                                | 0.0149 (0.0224)  |                                    |                       | 2 <sup>nd</sup> tertile                                                                                                | -0.0067 (0.0044) |                                    |                       | 2 <sup>nd</sup> tertile                                                                                                | 0.0109 (0.0206)  |                                    |                       |
|                           | 3 <sup>rd</sup> tertile                                                                                                | 0.02937 (0.0225) |                                    |                       | 3 <sup>rd</sup> tertile                                                                                                | -0.0036 (0.0040) |                                    |                       | 3 <sup>rd</sup> tertile                                                                                                | 0.0135 (0.0207)  |                                    |                       |
|                           | 4 <sup>th</sup> tertile                                                                                                |                  |                                    |                       | 4 <sup>th</sup> tertile                                                                                                |                  |                                    |                       | 4 <sup>th</sup> tertile                                                                                                |                  |                                    |                       |
| Palmitic acid (16:0)      | 1 <sup>st</sup> tertile                                                                                                | Reference        | 0.003                              | 0.207                 | 1 <sup>st</sup> tertile                                                                                                | Reference        | <0.001                             | 0.020                 | 1 <sup>st</sup> tertile                                                                                                | Reference        | 0.399                              | 1.00                  |
|                           | 2 <sup>nd</sup> tertile                                                                                                | -0.0100 (0.0226) |                                    |                       | 2 <sup>nd</sup> tertile                                                                                                | 0.0024 (0.0041)  |                                    |                       | 2 <sup>nd</sup> tertile                                                                                                | -0.0030 (0.0205) |                                    |                       |
|                           | 3 <sup>rd</sup> tertile                                                                                                | -0.0273 (0.0229) |                                    |                       | 3 <sup>rd</sup> tertile                                                                                                | 0.0046 (0.0042)  |                                    |                       | 3 <sup>rd</sup> tertile                                                                                                | -0.0175 (0.0208) |                                    |                       |
|                           | 4 <sup>th</sup> tertile                                                                                                |                  |                                    |                       | 4 <sup>th</sup> tertile                                                                                                |                  |                                    |                       | 4 <sup>th</sup> tertile                                                                                                |                  |                                    |                       |
| Heptadecanoic acid (17:0) | 1 <sup>st</sup> tertile                                                                                                | Reference        | <0.00001                           | <0.00001              | 1 <sup>st</sup> tertile                                                                                                | Reference        | <0.00001                           | <0.001                | 1 <sup>st</sup> tertile                                                                                                | Reference        | <0.00001                           | <0.00001              |
|                           | 2 <sup>nd</sup> tertile                                                                                                | -0.0369 (0.0216) |                                    |                       | 2 <sup>nd</sup> tertile                                                                                                | -0.0220 (0.0040) |                                    |                       | 2 <sup>nd</sup> tertile                                                                                                | -0.0093 (0.0197) |                                    |                       |
|                           | 3 <sup>rd</sup> tertile                                                                                                | 0.0001 (0.0225)  |                                    |                       | 3 <sup>rd</sup> tertile                                                                                                | 0.0010 (0.0040)  |                                    |                       | 3 <sup>rd</sup> tertile                                                                                                | 0.0039 (0.0206)  |                                    |                       |
|                           | 4 <sup>th</sup> tertile                                                                                                |                  |                                    |                       | 4 <sup>th</sup> tertile                                                                                                |                  |                                    |                       | 4 <sup>th</sup> tertile                                                                                                |                  |                                    |                       |
| Stearic acid (18:0)       | 1 <sup>st</sup> tertile                                                                                                | Reference        | <0.00001                           | <0.00001              | 1 <sup>st</sup> tertile                                                                                                | Reference        | <0.00001                           | <0.00001              | 1 <sup>st</sup> tertile                                                                                                | Reference        | <0.00001                           | <0.00001              |
|                           | 2 <sup>nd</sup> tertile                                                                                                | -0.0221 (0.0219) |                                    |                       | 2 <sup>nd</sup> tertile                                                                                                | -0.0123 (0.0042) |                                    |                       | 2 <sup>nd</sup> tertile                                                                                                | -0.0158 (0.0199) |                                    |                       |
|                           | 3 <sup>rd</sup> tertile                                                                                                | -0.0146 (0.0225) |                                    |                       | 3 <sup>rd</sup> tertile                                                                                                | -0.0195 (0.0042) |                                    |                       | 3 <sup>rd</sup> tertile                                                                                                | -0.0044 (0.0205) |                                    |                       |
|                           | 4 <sup>th</sup> tertile                                                                                                |                  |                                    |                       | 4 <sup>th</sup> tertile                                                                                                |                  |                                    |                       | 4 <sup>th</sup> tertile                                                                                                |                  |                                    |                       |
| Arachidic acid (20:0)     | 1 <sup>st</sup> tertile                                                                                                | Reference        | 0.0019                             | 0.124                 | 1 <sup>st</sup> tertile                                                                                                | Reference        | 0.012                              | 0.790                 | 1 <sup>st</sup> tertile                                                                                                | Reference        | <0.00001                           | <0.001                |
|                           | 2 <sup>nd</sup> tertile                                                                                                | -0.0249 (0.0214) |                                    |                       | 2 <sup>nd</sup> tertile                                                                                                | 0.0027 (0.0044)  |                                    |                       | 2 <sup>nd</sup> tertile                                                                                                | -0.0199 (0.0194) |                                    |                       |
|                           | 3 <sup>rd</sup> tertile                                                                                                | -0.0410 (0.0239) |                                    |                       | 3 <sup>rd</sup> tertile                                                                                                | -0.0139 (0.0042) |                                    |                       | 3 <sup>rd</sup> tertile                                                                                                | -0.0221 (0.0219) |                                    |                       |
|                           | 4 <sup>th</sup> tertile                                                                                                |                  |                                    |                       | 4 <sup>th</sup> tertile                                                                                                |                  |                                    |                       | 4 <sup>th</sup> tertile                                                                                                |                  |                                    |                       |

[illegible]

**Supplementary Table S4B. Association between individual SFA and fetal growth biometrics (HC, BPD, HC/AC ratio) throughout between 10-40 weeks gestation**

| SFAs in tertiles                                      | Head circumference (HC), mm                                                                                            |                   |                                    |                       | Biparietal diameter (BPD), mm                                                                                          |                  |                                    |                       | HC/AC ratio                                                                                                            |                  |                                    |                       |
|-------------------------------------------------------|------------------------------------------------------------------------------------------------------------------------|-------------------|------------------------------------|-----------------------|------------------------------------------------------------------------------------------------------------------------|------------------|------------------------------------|-----------------------|------------------------------------------------------------------------------------------------------------------------|------------------|------------------------------------|-----------------------|
|                                                       | Global test after adjusting for maternal age, ethnicity/race, nulliparity, pre-pregnancy body mass index and fetal sex |                   |                                    |                       | Global test after adjusting for maternal age, ethnicity/race, nulliparity, pre-pregnancy body mass index and fetal sex |                  |                                    |                       | Global test after adjusting for maternal age, ethnicity/race, nulliparity, pre-pregnancy body mass index and fetal sex |                  |                                    |                       |
|                                                       | Without interaction term                                                                                               |                   | With additional interaction SFA*GA |                       | Without interaction term                                                                                               |                  | With additional interaction SFA*GA |                       | Without interaction term                                                                                               |                  | With additional interaction SFA*GA |                       |
|                                                       | SFA*GA                                                                                                                 |                   | SFA*GA                             |                       | SFA*GA                                                                                                                 |                  | SFA*GA                             |                       | SFA*GA                                                                                                                 |                  | SFA*GA                             |                       |
|                                                       |                                                                                                                        |                   | likelihood ratio                   | Bonferroni correction |                                                                                                                        |                  | likelihood ratio                   | Bonferroni correction |                                                                                                                        |                  | likelihood ratio                   | Bonferroni correction |
|                                                       | Mean difference in log (SE)                                                                                            | P value           | P value                            |                       | Mean difference in log (SE)                                                                                            | P value          | P value                            |                       | Mean difference in log (SE)                                                                                            | P value          | P value                            |                       |
| 14:0                                                  | 1 <sup>st</sup> tertile                                                                                                | Reference         | <0.00001                           | <0.00001              | 1 <sup>st</sup> tertile                                                                                                | Reference        | <0.00001                           | <0.00001              | 1 <sup>st</sup> tertile                                                                                                | Reference        | <0.00001                           | <0.00001              |
|                                                       | 2 <sup>nd</sup> tertile                                                                                                | -0.0135 (0.0033)  |                                    |                       | 2 <sup>nd</sup> tertile                                                                                                | -0.0166 (0.0038) |                                    |                       | 2 <sup>nd</sup> tertile                                                                                                | 0.0094 (0.0030)  |                                    |                       |
|                                                       | 3 <sup>rd</sup> tertile                                                                                                | -0.0267 (0.0034)  |                                    |                       | 3 <sup>rd</sup> tertile                                                                                                | -0.0239 (0.0039) |                                    |                       | 3 <sup>rd</sup> tertile                                                                                                | -0.0011 (0.0032) |                                    |                       |
| 15:0                                                  | 1 <sup>st</sup> tertile                                                                                                | Reference         | <0.00001                           | <0.00001              | 1 <sup>st</sup> tertile                                                                                                | Reference        | <0.00001                           | <0.00001              | 1 <sup>st</sup> tertile                                                                                                | Reference        | <0.00001                           | <0.00001              |
|                                                       | 2 <sup>nd</sup> tertile                                                                                                | 0.0006 (0.0136)   |                                    |                       | 2 <sup>nd</sup> tertile                                                                                                | 0.0017 (0.0041)  |                                    |                       | 2 <sup>nd</sup> tertile                                                                                                | 0.0037 (0.0033)  |                                    |                       |
|                                                       | 3 <sup>rd</sup> tertile                                                                                                | 0.0112 (0.0137)   |                                    |                       | 3 <sup>rd</sup> tertile                                                                                                | 0.0037 (0.0037)  |                                    |                       | 3 <sup>rd</sup> tertile                                                                                                | -0.0012 (0.0030) |                                    |                       |
| 16:0                                                  | 1 <sup>st</sup> tertile                                                                                                | Reference         | 0.717                              | 1.00                  | 1 <sup>st</sup> tertile                                                                                                | Reference        | 0.025                              | 1.00                  | 1 <sup>st</sup> tertile                                                                                                | Reference        | <0.00001                           | <0.00001              |
|                                                       | 2 <sup>nd</sup> tertile                                                                                                | 0.0003 (0.0139)   |                                    |                       | 2 <sup>nd</sup> tertile                                                                                                | -0.0007 (0.0038) |                                    |                       | 2 <sup>nd</sup> tertile                                                                                                | -0.0044 (0.0031) |                                    |                       |
|                                                       | 3 <sup>rd</sup> tertile                                                                                                | -0.0054 (0.0140)  |                                    |                       | 3 <sup>rd</sup> tertile                                                                                                | -0.0003 (0.0039) |                                    |                       | 3 <sup>rd</sup> tertile                                                                                                | -0.0103 (0.0031) |                                    |                       |
| 17:0                                                  | 1 <sup>st</sup> tertile                                                                                                | Reference         | <0.00001                           | <0.00001              | 1 <sup>st</sup> tertile                                                                                                | Reference        | <0.00001                           | <0.00001              | 1 <sup>st</sup> tertile                                                                                                | Reference        | 0.028                              | 1.00                  |
|                                                       | 2 <sup>nd</sup> tertile                                                                                                | -0.0256 (0.0032)  |                                    |                       | 2 <sup>nd</sup> tertile                                                                                                | -0.0218 (0.0037) |                                    |                       | 2 <sup>nd</sup> tertile                                                                                                | -0.0038 (0.0030) |                                    |                       |
|                                                       | 3 <sup>rd</sup> tertile                                                                                                | 0.0021 (0.0032)   |                                    |                       | 3 <sup>rd</sup> tertile                                                                                                | 0.0066 (0.0037)  |                                    |                       | 3 <sup>rd</sup> tertile                                                                                                | 0.0016 (0.0030)  |                                    |                       |
| 18:0                                                  | 1 <sup>st</sup> tertile                                                                                                | Reference         | <0.00001                           | <0.00001              | 1 <sup>st</sup> tertile                                                                                                | Reference        | <0.00001                           | <0.00001              | 1 <sup>st</sup> tertile                                                                                                | Reference        | <0.00001                           | <0.00001              |
|                                                       | 2 <sup>nd</sup> tertile                                                                                                | 0.0084 (0.0034)   |                                    |                       | 2 <sup>nd</sup> tertile                                                                                                | 0.0132 (0.0039)  |                                    |                       | 2 <sup>nd</sup> tertile                                                                                                | 0.0208 (0.0031)  |                                    |                       |
|                                                       | 3 <sup>rd</sup> tertile                                                                                                | 0.0030 (0.0035)   |                                    |                       | 3 <sup>rd</sup> tertile                                                                                                | 0.0023 (0.0039)  |                                    |                       | 3 <sup>rd</sup> tertile                                                                                                | 0.0225 (0.0031)  |                                    |                       |
| 20:0                                                  | 1 <sup>st</sup> tertile                                                                                                | Reference         | <0.00001                           | 0.001                 | 1 <sup>st</sup> tertile                                                                                                | Reference        | <0.00001                           | <0.00001              | 1 <sup>st</sup> tertile                                                                                                | Reference        | <0.001                             | 0.017                 |
|                                                       | 2 <sup>nd</sup> tertile                                                                                                | -0.0025 (0.0036)  |                                    |                       | 2 <sup>nd</sup> tertile                                                                                                | -0.0025 (0.0041) |                                    |                       | 2 <sup>nd</sup> tertile                                                                                                | -0.0057 (0.0033) |                                    |                       |
|                                                       | 3 <sup>rd</sup> tertile                                                                                                | -0.0188 (0.0034)  |                                    |                       | 3 <sup>rd</sup> tertile                                                                                                | -0.0192 (0.0039) |                                    |                       | 3 <sup>rd</sup> tertile                                                                                                | -0.0052 (0.0031) |                                    |                       |
| 22:0                                                  | 1 <sup>st</sup> tertile                                                                                                | Reference         | <0.00001                           | <0.00001              | 1 <sup>st</sup> tertile                                                                                                | Reference        | <0.00001                           | <0.00001              | 1 <sup>st</sup> tertile                                                                                                | Reference        | <0.00001                           | <0.00001              |
|                                                       | 2 <sup>nd</sup> tertile                                                                                                | 2.97E-06 (0.0036) |                                    |                       | 2 <sup>nd</sup> tertile                                                                                                | -0.0012 (0.0041) |                                    |                       | 2 <sup>nd</sup> tertile                                                                                                | -0.0112 (0.0033) |                                    |                       |
|                                                       | 3 <sup>rd</sup> tertile                                                                                                | -0.0201 (0.0035)  |                                    |                       | 3 <sup>rd</sup> tertile                                                                                                | -0.0216 (0.0039) |                                    |                       | 3 <sup>rd</sup> tertile                                                                                                | -0.0030 (0.0032) |                                    |                       |
| 24:0                                                  | 1 <sup>st</sup> tertile                                                                                                | Reference         | <0.00001                           | <0.00001              | 1 <sup>st</sup> tertile                                                                                                | Reference        | <0.00001                           | <0.00001              | 1 <sup>st</sup> tertile                                                                                                | Reference        | <0.00001                           | <0.00001              |
|                                                       | 2 <sup>nd</sup> tertile                                                                                                | -0.0250 (0.0035)  |                                    |                       | 2 <sup>nd</sup> tertile                                                                                                | -0.0321 (0.0039) |                                    |                       | 2 <sup>nd</sup> tertile                                                                                                | -0.0153 (0.0031) |                                    |                       |
|                                                       | 3 <sup>rd</sup> tertile                                                                                                | -0.0075 (0.0035)  |                                    |                       | 3 <sup>rd</sup> tertile                                                                                                | -0.0170 (0.0039) |                                    |                       | 3 <sup>rd</sup> tertile                                                                                                | 0.0049 (0.0032)  |                                    |                       |
| Sum of even-chain SFAs (14:0 + 16:0 + 18:0)           | 1 <sup>st</sup> tertile                                                                                                | Reference         | <0.00001                           | <0.00001              | 1 <sup>st</sup> tertile                                                                                                | Reference        | <0.00001                           | <0.00001              | 1 <sup>st</sup> tertile                                                                                                | Reference        | <0.00001                           | <0.00001              |
|                                                       | 2 <sup>nd</sup> tertile                                                                                                | 0.0100 (0.0032)   |                                    |                       | 2 <sup>nd</sup> tertile                                                                                                | 0.0134 (0.0037)  |                                    |                       | 2 <sup>nd</sup> tertile                                                                                                | -0.0009 (0.0030) |                                    |                       |
|                                                       | 3 <sup>rd</sup> tertile                                                                                                | -0.0132 (0.0034)  |                                    |                       | 3 <sup>rd</sup> tertile                                                                                                | -0.0093 (0.0039) |                                    |                       | 3 <sup>rd</sup> tertile                                                                                                | -0.0066 (0.0032) |                                    |                       |
| Sum of odd-chain SFAs (15:0 + 17:0)                   | 1 <sup>st</sup> tertile                                                                                                | Reference         | <0.00001                           | <0.00001              | 1 <sup>st</sup> tertile                                                                                                | Reference        | <0.00001                           | <0.00001              | 1 <sup>st</sup> tertile                                                                                                | Reference        | 0.002                              | 0.117                 |
|                                                       | 2 <sup>nd</sup> tertile                                                                                                | -0.0101 (0.0034)  |                                    |                       | 2 <sup>nd</sup> tertile                                                                                                | -0.0077 (0.0038) |                                    |                       | 2 <sup>nd</sup> tertile                                                                                                | -0.0041 (0.0031) |                                    |                       |
|                                                       | 3 <sup>rd</sup> tertile                                                                                                | 0.0043 (0.0033)   |                                    |                       | 3 <sup>rd</sup> tertile                                                                                                | 0.0108 (0.0037)  |                                    |                       | 3 <sup>rd</sup> tertile                                                                                                | 0.0031 (0.0030)  |                                    |                       |
| Sum of very-long-even-chain SFAs (20:0 + 22:0 + 24:0) | 1 <sup>st</sup> tertile                                                                                                | Reference         | <0.00001                           | <0.00001              | 1 <sup>st</sup> tertile                                                                                                | Reference        | <0.00001                           | <0.00001              | 1 <sup>st</sup> tertile                                                                                                | Reference        | <0.00001                           | <0.00001              |
|                                                       | 2 <sup>nd</sup> tertile                                                                                                | -0.0091 (0.0036)  |                                    |                       | 2 <sup>nd</sup> tertile                                                                                                | -0.0124 (0.0041) |                                    |                       | 2 <sup>nd</sup> tertile                                                                                                | -0.0076 (0.0033) |                                    |                       |
|                                                       | 3 <sup>rd</sup> tertile                                                                                                | -0.0020 (0.0035)  |                                    |                       | 3 <sup>rd</sup> tertile                                                                                                | -0.0245 (0.0039) |                                    |                       | 3 <sup>rd</sup> tertile                                                                                                | 0.0008 (0.0032)  |                                    |                       |

Supplementary Table S5A. Back-transformed and pairwise comparison of weekly fetal growth biometrics across myristic acid (14:0) tertiles in the NICHD Fetal Growth Studies-Singletons

| G<br>W | Estimated fetal weight (EFW), g        |                         |                         |                                            |                                            | Abdominal circumference (AC), mm  |                         |                         |                                            |                                            | Femur length (FL), mm             |                         |                         |                                            |                                            |
|--------|----------------------------------------|-------------------------|-------------------------|--------------------------------------------|--------------------------------------------|-----------------------------------|-------------------------|-------------------------|--------------------------------------------|--------------------------------------------|-----------------------------------|-------------------------|-------------------------|--------------------------------------------|--------------------------------------------|
|        | <u>Back-transformed geometric mean</u> |                         |                         | <u>Wald test for pairwise</u>              |                                            | <u>Back-transformed geometric</u> |                         |                         | <u>Wald test for pairwise</u>              |                                            | <u>Back-transformed geometric</u> |                         |                         | <u>Wald test for pairwise</u>              |                                            |
|        | gram                                   |                         |                         | <u>comparison</u>                          |                                            | mean mm                           |                         |                         | <u>comparison</u>                          |                                            | mean mm                           |                         |                         | <u>comparison</u>                          |                                            |
|        | 1 <sup>st</sup> tertile                | 2 <sup>nd</sup> tertile | 3 <sup>rd</sup> tertile | 2 <sup>nd</sup> vs 1 <sup>st</sup> p value | 3 <sup>rd</sup> vs 1 <sup>st</sup> p value | 1 <sup>st</sup> tertile           | 2 <sup>nd</sup> tertile | 3 <sup>rd</sup> tertile | 2 <sup>nd</sup> vs 1 <sup>st</sup> p value | 3 <sup>rd</sup> vs 1 <sup>st</sup> p value | 1 <sup>st</sup> tertile           | 2 <sup>nd</sup> tertile | 3 <sup>rd</sup> tertile | 2 <sup>nd</sup> vs 1 <sup>st</sup> p value | 3 <sup>rd</sup> vs 1 <sup>st</sup> p value |
| 10     | 37.47                                  | 38.76                   | 33.86                   | 0.711                                      | 0.241                                      | 39.67                             | 40.25                   | 36.11                   | 0.785                                      | <b>0.037</b>                               | 2.61                              | 2.30                    | 2.41                    | 0.112                                      | 0.278                                      |
| 11     | 45.81                                  | 46.22                   | 43.51                   | 0.852                                      | 0.258                                      | 48.21                             | 48.10                   | 45.95                   | 0.937                                      | <b>0.052</b>                               | 4.43                              | 4.02                    | 4.11                    | <b>0.025</b>                               | 0.056                                      |
| 12     | 56.84                                  | 56.27                   | 55.86                   | 0.652                                      | 0.431                                      | 57.73                             | 56.92                   | 56.73                   | 0.280                                      | 0.217                                      | 6.87                              | 6.38                    | 6.40                    | <b>0.002</b>                               | <b>0.001</b>                               |
| 13     | 71.32                                  | 69.63                   | 71.59                   | 0.183                                      | 0.830                                      | 68.16                             | 66.69                   | 68.16                   | <b>0.040</b>                               | 0.994                                      | 9.82                              | 9.29                    | 9.24                    | <b>0.009</b>                               | <b>0.001</b>                               |
| 14     | 90.09                                  | 87.16                   | 91.41                   | 0.130                                      | 0.479                                      | 79.38                             | 77.33                   | 79.95                   | <b>0.043</b>                               | 0.608                                      | 13.10                             | 12.58                   | 12.45                   | 0.081                                      | <b>0.017</b>                               |
| 15     | 114.13                                 | 109.85                  | 116.11                  | 0.096                                      | 0.412                                      | 91.23                             | 88.73                   | 91.86                   | <b>0.040</b>                               | 0.630                                      | 16.50                             | 16.02                   | 15.85                   | 0.207                                      | 0.064                                      |
| 16     | 144.40                                 | 138.74                  | 146.52                  | 0.061                                      | 0.455                                      | 103.54                            | 100.75                  | 103.70                  | <b>0.030</b>                               | 0.910                                      | 19.84                             | 19.39                   | 19.26                   | 0.309                                      | 0.149                                      |
| 17     | 181.71                                 | 174.76                  | 183.37                  | <b>0.044</b>                               | 0.619                                      | 116.11                            | 113.17                  | 115.39                  | <b>0.025</b>                               | 0.637                                      | 23.01                             | 22.58                   | 22.56                   | 0.367                                      | 0.310                                      |
| 18     | 226.52                                 | 218.53                  | 227.28                  | 0.057                                      | 0.859                                      | 128.70                            | 125.73                  | 126.94                  | <b>0.037</b>                               | 0.300                                      | 26.05                             | 25.59                   | 25.75                   | 0.384                                      | 0.557                                      |
| 19     | 278.82                                 | 270.03                  | 278.63                  | 0.095                                      | 0.972                                      | 141.12                            | 138.17                  | 138.46                  | 0.062                                      | 0.161                                      | 29.05                             | 28.53                   | 28.90                   | 0.379                                      | 0.789                                      |
| 20     | 338.92                                 | 329.27                  | 337.98                  | 0.130                                      | 0.886                                      | 153.23                            | 150.30                  | 149.90                  | 0.086                                      | 0.110                                      | 32.01                             | 31.47                   | 31.97                   | 0.407                                      | 0.953                                      |
| 21     | 407.24                                 | 396.66                  | 405.89                  | 0.153                                      | 0.859                                      | 164.92                            | 162.03                  | 161.21                  | 0.103                                      | 0.095                                      | 34.89                             | 34.37                   | 34.93                   | 0.466                                      | 0.946                                      |
| 22     | 484.19                                 | 472.64                  | 482.91                  | 0.169                                      | 0.881                                      | 176.15                            | 173.33                  | 172.34                  | 0.117                                      | 0.103                                      | 37.65                             | 37.22                   | 37.74                   | 0.562                                      | 0.897                                      |
| 23     | 570.18                                 | 557.74                  | 569.55                  | 0.195                                      | 0.948                                      | 186.93                            | 184.19                  | 183.28                  | 0.142                                      | 0.139                                      | 40.28                             | 39.98                   | 40.38                   | 0.702                                      | 0.891                                      |
| 24     | 665.69                                 | 652.59                  | 666.34                  | 0.248                                      | 0.954                                      | 197.28                            | 194.68                  | 194.03                  | 0.191                                      | 0.216                                      | 42.77                             | 42.64                   | 42.85                   | 0.874                                      | 0.921                                      |
| 25     | 771.31                                 | 758.04                  | 773.79                  | 0.333                                      | 0.854                                      | 207.31                            | 204.91                  | 204.64                  | 0.269                                      | 0.346                                      | 45.13                             | 45.19                   | 45.16                   | 0.947                                      | 0.972                                      |
| 26     | 887.78                                 | 875.21                  | 892.49                  | 0.445                                      | 0.771                                      | 217.16                            | 215.02                  | 215.18                  | 0.368                                      | 0.517                                      | 47.37                             | 47.63                   | 47.34                   | 0.790                                      | 0.972                                      |
| 27     | 1016.07                                | 1005.63                 | 1023.07                 | 0.582                                      | 0.707                                      | 226.99                            | 225.22                  | 225.74                  | 0.479                                      | 0.700                                      | 49.53                             | 49.97                   | 49.43                   | 0.663                                      | 0.921                                      |
| 28     | 1157.5                                 | 1151.32                 | 1166.31                 | 0.763                                      | 0.664                                      | 237.03                            | 235.74                  | 236.45                  | 0.607                                      | 0.863                                      | 51.63                             | 52.23                   | 51.49                   | 0.567                                      | 0.884                                      |
| 29     | 1313.48                                | 1314.54                 | 1322.95                 | 0.960                                      | 0.652                                      | 247.48                            | 246.84                  | 247.41                  | 0.786                                      | 0.984                                      | 53.72                             | 54.43                   | 53.56                   | 0.501                                      | 0.868                                      |
| 30     | 1484.95                                | 1495.09                 | 1493.01                 | 0.654                                      | 0.722                                      | 258.36                            | 258.40                  | 258.57                  | 0.988                                      | 0.953                                      | 55.80                             | 56.57                   | 55.64                   | 0.474                                      | 0.874                                      |
| 31     | 1672.73                                | 1690.64                 | 1676.05                 | 0.508                                      | 0.902                                      | 269.62                            | 270.13                  | 269.80                  | 0.842                                      | 0.963                                      | 57.86                             | 58.64                   | 57.71                   | 0.495                                      | 0.893                                      |
| 32     | 1877.61                                | 1897.1                  | 1871.22                 | 0.562                                      | 0.846                                      | 281.20                            | 281.71                  | 280.96                  | 0.865                                      | 0.954                                      | 59.88                             | 60.63                   | 59.75                   | 0.550                                      | 0.908                                      |
| 33     | 2100.32                                | 2108.42                 | 2077.26                 | 0.837                                      | 0.546                                      | 293.04                            | 292.73                  | 291.89                  | 0.925                                      | 0.799                                      | 61.86                             | 62.53                   | 61.71                   | 0.617                                      | 0.903                                      |
| 34     | 2341.57                                | 2316.43                 | 2292.41                 | 0.544                                      | 0.221                                      | 305.04                            | 302.78                  | 302.41                  | 0.479                                      | 0.571                                      | 63.79                             | 64.34                   | 63.58                   | 0.690                                      | 0.864                                      |
| 35     | 2599.99                                | 2512.83                 | 2514.32                 | <b>0.039</b>                               | <b>0.042</b>                               | 317.07                            | 311.50                  | 312.34                  | 0.068                                      | 0.323                                      | 65.66                             | 66.03                   | 65.33                   | 0.789                                      | 0.779                                      |
| 36     | 2864.36                                | 2700.45                 | 2737.9                  | <b>0.001</b>                               | <b>0.017</b>                               | 328.76                            | 319.41                  | 321.91                  | <b>0.007</b>                               | 0.187                                      | 67.47                             | 67.57                   | 66.92                   | 0.947                                      | 0.677                                      |
| 37     | 3116.67                                | 2889.51                 | 2954.85                 | <b>&lt;0.001</b>                           | <b>0.014</b>                               | 339.64                            | 327.44                  | 331.91                  | <b>0.003</b>                               | 0.173                                      | 69.22                             | 68.89                   | 68.39                   | 0.841                                      | 0.568                                      |
| 38     | 3334.04                                | 3093.96                 | 3155.12                 | <b>&lt;0.001</b>                           | <b>0.009</b>                               | 349.17                            | 336.60                  | 343.25                  | <b>0.003</b>                               | 0.317                                      | 70.92                             | 69.92                   | 69.72                   | 0.564                                      | 0.421                                      |
| 39     | 3490.46                                | 3331.94                 | 3327.35                 | 0.077                                      | 0.078                                      | 356.81                            | 348.05                  | 356.99                  | 0.089                                      | 0.979                                      | 72.57                             | 70.60                   | 70.94                   | 0.330                                      | 0.368                                      |
| 40     | 3559.90                                | 3627.07                 | 3459.62                 | 0.718                                      | 0.631                                      | 362.00                            | 363.09                  | 374.37                  | 0.917                                      | 0.288                                      | 74.18                             | 70.87                   | 72.06                   | 0.346                                      | 0.555                                      |

Supplementary Table S5B. Back-transformed and pairwise comparison of weekly fetal growth biometrics across myristic acid (14:0) tertiles in the NICHD Fetal Growth Studies-Singletons

| G<br>W | Head circumference (HC), mm |                         |                         |                                            |                                            | Biparietal diameter (BPD), mm |                         |                         |                                            |                                            | HC/AC ratio                |                         |                         |                                            |                                            |
|--------|-----------------------------|-------------------------|-------------------------|--------------------------------------------|--------------------------------------------|-------------------------------|-------------------------|-------------------------|--------------------------------------------|--------------------------------------------|----------------------------|-------------------------|-------------------------|--------------------------------------------|--------------------------------------------|
|        | Back-transformed geometric  |                         |                         | Wald test for pairwise                     |                                            | Back-transformed geometric    |                         |                         | Wald test for pairwise                     |                                            | Back-transformed geometric |                         |                         | Wald test for pairwise                     |                                            |
|        | mean                        |                         |                         | comparison                                 |                                            | mean mm                       |                         |                         | comparison                                 |                                            | mean                       |                         |                         | comparison                                 |                                            |
|        | mm                          |                         |                         | p value                                    |                                            | mm                            |                         |                         | p value                                    |                                            | mm                         |                         |                         | p value                                    |                                            |
|        | 1 <sup>st</sup> tertile     | 2 <sup>nd</sup> tertile | 3 <sup>rd</sup> tertile | 2 <sup>nd</sup> vs 1 <sup>st</sup> tertile | 3 <sup>rd</sup> vs 1 <sup>st</sup> tertile | 1 <sup>st</sup> tertile       | 2 <sup>nd</sup> tertile | 3 <sup>rd</sup> tertile | 2 <sup>nd</sup> vs 1 <sup>st</sup> tertile | 3 <sup>rd</sup> vs 1 <sup>st</sup> tertile | 1 <sup>st</sup> tertile    | 2 <sup>nd</sup> tertile | 3 <sup>rd</sup> tertile | 2 <sup>nd</sup> vs 1 <sup>st</sup> tertile | 3 <sup>rd</sup> vs 1 <sup>st</sup> tertile |
| 10     | 55.24                       | 48.44                   | 47.05                   | <b>0.002</b>                               | <b>&lt;0.0001</b>                          | 13.35                         | 12.27                   | 11.77                   | 0.077                                      | <b>0.002</b>                               | 1.39                       | 1.21                    | 1.25                    | <b>&lt;0.001</b>                           | <b>0.005</b>                               |
| 11     | 64.60                       | 59.49                   | 59.18                   | <b>&lt;0.001</b>                           | <b>&lt;0.0001</b>                          | 16.41                         | 15.49                   | 15.41                   | <b>0.022</b>                               | <b>0.003</b>                               | 1.34                       | 1.24                    | 1.25                    | <b>&lt;0.001</b>                           | <b>&lt;0.001</b>                           |
| 12     | 74.83                       | 71.38                   | 72.17                   | <b>&lt;0.0001</b>                          | <b>&lt;0.0001</b>                          | 19.68                         | 18.98                   | 19.32                   | <b>0.002</b>                               | 0.078                                      | 1.30                       | 1.26                    | 1.24                    | <b>&lt;0.001</b>                           | <b>&lt;0.0001</b>                          |
| 13     | 85.89                       | 83.88                   | 85.60                   | <b>0.006</b>                               | 0.653                                      | 23.09                         | 22.63                   | 23.32                   | <b>0.037</b>                               | 0.216                                      | 1.26                       | 1.26                    | 1.23                    | 0.677                                      | <b>0.002</b>                               |
| 14     | 97.67                       | 96.72                   | 99.12                   | 0.357                                      | 0.085                                      | 26.56                         | 26.34                   | 27.25                   | 0.481                                      | <b>0.007</b>                               | 1.23                       | 1.25                    | 1.22                    | 0.113                                      | 0.299                                      |
| 15     | 110.04                      | 109.70                  | 112.43                  | 0.780                                      | <b>0.015</b>                               | 30.03                         | 30.03                   | 30.98                   | 0.995                                      | <b>0.001</b>                               | 1.21                       | 1.24                    | 1.21                    | <b>0.018</b>                               | 0.977                                      |
| 16     | 122.84                      | 122.63                  | 125.35                  | 0.872                                      | <b>0.0132</b>                              | 33.46                         | 33.63                   | 34.47                   | 0.654                                      | <b>0.001</b>                               | 1.19                       | 1.22                    | 1.19                    | <b>0.006</b>                               | 0.483                                      |
| 17     | 135.86                      | 135.42                  | 137.85                  | 0.727                                      | 0.057                                      | 36.81                         | 37.12                   | 37.73                   | 0.432                                      | <b>0.004</b>                               | 1.17                       | 1.2                     | 1.18                    | <b>0.008</b>                               | 0.263                                      |
| 18     | 148.90                      | 148.03                  | 150.06                  | 0.526                                      | 0.316                                      | 40.10                         | 40.50                   | 40.85                   | 0.330                                      | <b>0.033</b>                               | 1.16                       | 1.18                    | 1.17                    | <b>0.029</b>                               | 0.210                                      |
| 19     | 161.71                      | 160.54                  | 162.17                  | 0.432                                      | 0.722                                      | 43.35                         | 43.82                   | 43.96                   | 0.281                                      | 0.122                                      | 1.15                       | 1.16                    | 1.16                    | 0.085                                      | 0.203                                      |
| 20     | 174.16                      | 172.90                  | 174.16                  | 0.430                                      | 0.996                                      | 46.53                         | 47.10                   | 47.05                   | 0.229                                      | 0.218                                      | 1.14                       | 1.15                    | 1.15                    | 0.133                                      | 0.201                                      |
| 21     | 186.16                      | 185.04                  | 185.95                  | 0.496                                      | 0.885                                      | 49.64                         | 50.30                   | 50.12                   | 0.171                                      | 0.266                                      | 1.13                       | 1.14                    | 1.14                    | 0.137                                      | 0.201                                      |
| 22     | 197.65                      | 196.88                  | 197.46                  | 0.641                                      | 0.893                                      | 52.67                         | 53.43                   | 53.15                   | 0.120                                      | 0.263                                      | 1.12                       | 1.14                    | 1.13                    | 0.108                                      | 0.210                                      |
| 23     | 208.63                      | 208.37                  | 208.64                  | 0.877                                      | 0.995                                      | 55.60                         | 56.46                   | 56.12                   | 0.087                                      | 0.235                                      | 1.12                       | 1.13                    | 1.13                    | 0.074                                      | 0.247                                      |
| 24     | 219.11                      | 219.47                  | 219.46                  | 0.844                                      | 0.821                                      | 58.44                         | 59.40                   | 59.02                   | 0.075                                      | 0.213                                      | 1.11                       | 1.13                    | 1.12                    | 0.055                                      | 0.329                                      |
| 25     | 229.15                      | 230.17                  | 229.9                   | 0.606                                      | 0.653                                      | 61.22                         | 62.25                   | 61.84                   | 0.078                                      | 0.212                                      | 1.11                       | 1.12                    | 1.11                    | <b>0.048</b>                               | 0.456                                      |
| 26     | 238.84                      | 240.49                  | 239.97                  | 0.443                                      | 0.536                                      | 63.93                         | 65.02                   | 64.57                   | 0.086                                      | 0.236                                      | 1.10                       | 1.12                    | 1.11                    | <b>0.049</b>                               | 0.608                                      |
| 27     | 248.31                      | 250.45                  | 249.66                  | 0.341                                      | 0.475                                      | 66.61                         | 67.74                   | 67.22                   | 0.092                                      | 0.287                                      | 1.10                       | 1.11                    | 1.10                    | 0.054                                      | 0.764                                      |
| 28     | 257.70                      | 260.11                  | 259.04                  | 0.278                                      | 0.478                                      | 69.29                         | 70.42                   | 69.77                   | 0.088                                      | 0.395                                      | 1.09                       | 1.10                    | 1.09                    | 0.065                                      | 0.919                                      |
| 29     | 267.15                      | 269.52                  | 268.12                  | 0.255                                      | 0.586                                      | 72.00                         | 73.09                   | 72.24                   | 0.079                                      | 0.645                                      | 1.08                       | 1.09                    | 1.08                    | 0.105                                      | 0.915                                      |
| 30     | 276.53                      | 278.62                  | 276.86                  | 0.305                                      | 0.854                                      | 74.69                         | 75.72                   | 74.63                   | 0.088                                      | 0.913                                      | 1.07                       | 1.08                    | 1.07                    | 0.243                                      | 0.766                                      |
| 31     | 285.67                      | 287.27                  | 285.19                  | 0.469                                      | 0.802                                      | 77.31                         | 78.26                   | 76.94                   | 0.152                                      | 0.515                                      | 1.06                       | 1.06                    | 1.06                    | 0.520                                      | 0.696                                      |
| 32     | 294.35                      | 295.36                  | 293.06                  | 0.690                                      | 0.551                                      | 79.81                         | 80.65                   | 79.17                   | 0.266                                      | 0.328                                      | 1.05                       | 1.05                    | 1.04                    | 0.717                                      | 0.714                                      |
| 33     | 302.33                      | 302.73                  | 300.39                  | 0.884                                      | 0.402                                      | 82.11                         | 82.82                   | 81.34                   | 0.381                                      | 0.272                                      | 1.03                       | 1.03                    | 1.03                    | 0.644                                      | 0.801                                      |
| 34     | 309.38                      | 309.26                  | 307.13                  | 0.964                                      | 0.315                                      | 84.14                         | 84.72                   | 83.46                   | 0.463                                      | 0.315                                      | 1.01                       | 1.02                    | 1.01                    | 0.275                                      | 0.988                                      |
| 35     | 315.28                      | 314.83                  | 313.20                  | 0.856                                      | 0.332                                      | 85.85                         | 86.30                   | 85.53                   | 0.550                                      | 0.626                                      | 0.99                       | 1.01                    | 1.00                    | <b>0.016</b>                               | 0.687                                      |
| 36     | 320.03                      | 319.52                  | 318.38                  | 0.853                                      | 0.510                                      | 87.25                         | 87.57                   | 87.45                   | 0.701                                      | 0.793                                      | 0.97                       | 1.00                    | 0.98                    | <b>&lt;0.001</b>                           | 0.437                                      |
| 37     | 323.68                      | 323.48                  | 322.34                  | 0.949                                      | 0.642                                      | 88.40                         | 88.63                   | 89.04                   | 0.809                                      | 0.474                                      | 0.96                       | 0.99                    | 0.96                    | <b>&lt;0.0001</b>                          | 0.301                                      |
| 38     | 326.31                      | 326.87                  | 324.71                  | 0.868                                      | 0.579                                      | 89.33                         | 89.56                   | 90.07                   | 0.822                                      | 0.405                                      | 0.94                       | 0.97                    | 0.95                    | <b>&lt;0.0001</b>                          | 0.183                                      |
| 39     | 328.00                      | 329.90                  | 325.16                  | 0.635                                      | 0.448                                      | 90.11                         | 90.44                   | 90.33                   | 0.781                                      | 0.844                                      | 0.92                       | 0.95                    | 0.93                    | <b>0.004</b>                               | 0.263                                      |
| 40     | 328.84                      | 332.73                  | 323.38                  | 0.617                                      | 0.501                                      | 90.78                         | 91.36                   | 89.63                   | 0.803                                      | 0.646                                      | 0.91                       | 0.92                    | 0.92                    | 0.558                                      | 0.646                                      |

HC/AC ratio, head circumference/abdominal circumference ratio.



**Supplementary Table S6. Back-transformed and pairwise comparison of weekly fetal growth biometrics across palmitic acid (16:0) tertiles in the NICHD Fetal Growth Studies-Singletons**

| GW | Abdominal circumference, mm         |                         |                         |                                            |                                            |
|----|-------------------------------------|-------------------------|-------------------------|--------------------------------------------|--------------------------------------------|
|    | Back-transformed geometric mean, mm |                         |                         | Wald test p value for pairwise comparison  |                                            |
|    | 1 <sup>st</sup> tertile             | 2 <sup>nd</sup> tertile | 3 <sup>rd</sup> tertile | 2 <sup>nd</sup> vs 1 <sup>st</sup> tertile | 3 <sup>rd</sup> vs 1 <sup>st</sup> tertile |
| 10 | 38.83                               | 38.74                   | 37.30                   | 0.961                                      | 0.384                                      |
| 11 | 47.45                               | 47.79                   | 46.79                   | 0.771                                      | 0.581                                      |
| 12 | 57.11                               | 57.77                   | 57.15                   | 0.330                                      | 0.958                                      |
| 13 | 67.72                               | 68.55                   | 68.13                   | 0.249                                      | 0.604                                      |
| 14 | 79.17                               | 79.96                   | 79.50                   | 0.430                                      | 0.749                                      |
| 15 | 91.28                               | 91.83                   | 91.06                   | 0.647                                      | 0.860                                      |
| 16 | 103.86                              | 103.99                  | 102.66                  | 0.917                                      | 0.377                                      |
| 17 | 116.65                              | 116.28                  | 114.23                  | 0.775                                      | 0.089                                      |
| 18 | 129.4                               | 128.59                  | 125.80                  | 0.564                                      | <b>0.019</b>                               |
| 19 | 141.85                              | 140.85                  | 137.36                  | 0.524                                      | <b>0.008</b>                               |
| 20 | 153.84                              | 152.97                  | 148.85                  | 0.609                                      | <b>0.007</b>                               |
| 21 | 165.28                              | 164.84                  | 160.20                  | 0.802                                      | <b>0.011</b>                               |
| 22 | 176.17                              | 176.40                  | 171.38                  | 0.900                                      | <b>0.023</b>                               |
| 23 | 186.54                              | 187.60                  | 182.41                  | 0.565                                      | 0.066                                      |
| 24 | 196.50                              | 198.44                  | 193.32                  | 0.316                                      | 0.187                                      |
| 25 | 206.21                              | 208.94                  | 204.16                  | 0.192                                      | 0.433                                      |
| 26 | 215.88                              | 219.17                  | 215.04                  | 0.150                                      | 0.767                                      |
| 27 | 225.77                              | 229.19                  | 226.08                  | 0.157                                      | 0.916                                      |
| 28 | 236.20                              | 239.15                  | 237.46                  | 0.226                                      | 0.689                                      |
| 29 | 247.48                              | 249.16                  | 249.23                  | 0.472                                      | 0.591                                      |
| 30 | 259.49                              | 259.28                  | 261.23                  | 0.924                                      | 0.612                                      |
| 31 | 271.91                              | 269.53                  | 273.21                  | 0.337                                      | 0.725                                      |
| 32 | 284.34                              | 279.95                  | 284.92                  | 0.122                                      | 0.886                                      |
| 33 | 296.31                              | 290.56                  | 296.04                  | 0.065                                      | 0.952                                      |
| 34 | 307.28                              | 301.42                  | 306.25                  | 0.058                                      | 0.820                                      |
| 35 | 316.81                              | 312.55                  | 315.32                  | 0.150                                      | 0.749                                      |
| 36 | 325.36                              | 323.77                  | 323.95                  | 0.639                                      | 0.779                                      |
| 37 | 333.84                              | 334.77                  | 333.30                  | 0.821                                      | 0.922                                      |
| 38 | 343.25                              | 345.19                  | 344.66                  | 0.654                                      | 0.809                                      |
| 39 | 354.71                              | 354.61                  | 359.51                  | 0.982                                      | 0.449                                      |
| 40 | 369.52                              | 362.63                  | 379.64                  | 0.420                                      | 0.285                                      |

Supplementary Table S7A. Back-transformed and pairwise comparison of weekly fetal growth biometrics across sum of even-chain SFAs tertiles in the NICHD Fetal Growth Studies-Singletons

| G<br>W | Estimated fetal weight, g              |                         |                         |                                            |                                            | Abdominal circumference, mm       |                         |                         |                                            |                                            | Femur length, mm                  |                         |                         |                                            |                                            |
|--------|----------------------------------------|-------------------------|-------------------------|--------------------------------------------|--------------------------------------------|-----------------------------------|-------------------------|-------------------------|--------------------------------------------|--------------------------------------------|-----------------------------------|-------------------------|-------------------------|--------------------------------------------|--------------------------------------------|
|        | <u>Back-transformed geometric mean</u> |                         |                         | <u>Wald test for pairwise</u>              |                                            | <u>Back-transformed geometric</u> |                         |                         | <u>Wald test for pairwise</u>              |                                            | <u>Back-transformed geometric</u> |                         |                         | <u>Wald test for pairwise</u>              |                                            |
|        | gram                                   |                         |                         | comparison                                 |                                            | mean mm                           |                         |                         | comparison                                 |                                            | mean                              |                         |                         | comparison                                 |                                            |
|        | 1 <sup>st</sup> tertile                | 2 <sup>nd</sup> tertile | 3 <sup>rd</sup> tertile | 2 <sup>nd</sup> vs 1 <sup>st</sup> p value | 3 <sup>rd</sup> vs 1 <sup>st</sup> p value | 1 <sup>st</sup> tertile           | 2 <sup>nd</sup> tertile | 3 <sup>rd</sup> tertile | 2 <sup>nd</sup> vs 1 <sup>st</sup> p value | 3 <sup>rd</sup> vs 1 <sup>st</sup> p value | 1 <sup>st</sup> tertile           | 2 <sup>nd</sup> tertile | 3 <sup>rd</sup> tertile | 2 <sup>nd</sup> vs 1 <sup>st</sup> p value | 3 <sup>rd</sup> vs 1 <sup>st</sup> p value |
| 10     | 31.44                                  | 41.46                   | 35.96                   | <b>0.002</b>                               | 0.073                                      | 34.40                             | 44.93                   | 36.03                   | <b>&lt;0.0001</b>                          | 0.307                                      | 1.67                              | 2.97                    | 2.66                    | <b>&lt;0.0001</b>                          | <b>&lt;0.0001</b>                          |
| 11     | 41.77                                  | 48.67                   | 43.96                   | <b>0.001</b>                               | 0.218                                      | 44.53                             | 51.78                   | 45.66                   | <b>&lt;0.0001</b>                          | 0.328                                      | 3.45                              | 4.73                    | 4.31                    | <b>&lt;0.0001</b>                          | <b>&lt;0.0001</b>                          |
| 12     | 54.94                                  | 58.75                   | 54.56                   | <b>0.001</b>                               | 0.769                                      | 55.79                             | 59.75                   | 56.19                   | <b>&lt;0.0001</b>                          | 0.632                                      | 6.14                              | 7.02                    | 6.48                    | <b>&lt;0.0001</b>                          | <b>0.028</b>                               |
| 13     | 71.53                                  | 72.48                   | 68.47                   | 0.452                                      | <b>0.030</b>                               | 67.85                             | 68.9                    | 67.36                   | 0.130                                      | 0.578                                      | 9.63                              | 9.78                    | 9.12                    | 0.295                                      | <b>0.009</b>                               |
| 14     | 92.19                                  | 90.82                   | 86.53                   | 0.478                                      | <b>0.005</b>                               | 80.39                             | 79.23                   | 78.92                   | 0.235                                      | 0.198                                      | 13.53                             | 12.89                   | 12.11                   | <b>0.010</b>                               | <b>&lt;0.0001</b>                          |
| 15     | 117.58                                 | 114.87                  | 109.67                  | 0.287                                      | <b>0.003</b>                               | 93.07                             | 90.67                   | 90.64                   | <b>0.040</b>                               | 0.073                                      | 17.42                             | 16.19                   | 15.31                   | <b>&lt;0.001</b>                           | <b>&lt;0.0001</b>                          |
| 16     | 148.38                                 | 145.77                  | 138.82                  | 0.376                                      | <b>0.003</b>                               | 105.64                            | 103.06                  | 102.35                  | <b>0.034</b>                               | <b>0.027</b>                               | 20.93                             | 19.54                   | 18.59                   | <b>&lt;0.001</b>                           | <b>&lt;0.0001</b>                          |
| 17     | 185.24                                 | 184.44                  | 174.77                  | 0.812                                      | <b>0.006</b>                               | 117.94                            | 116.12                  | 114.00                  | 0.139                                      | <b>0.013</b>                               | 23.93                             | 22.84                   | 21.86                   | <b>0.004</b>                               | <b>&lt;0.0001</b>                          |
| 18     | 228.72                                 | 231.26                  | 217.96                  | 0.537                                      | <b>0.022</b>                               | 129.92                            | 129.42                  | 125.62                  | 0.707                                      | <b>0.012</b>                               | 26.56                             | 26.05                   | 25.10                   | 0.221                                      | <b>0.005</b>                               |
| 19     | 279.30                                 | 285.9                   | 268.51                  | 0.208                                      | 0.065                                      | 141.65                            | 142.48                  | 137.26                  | 0.588                                      | <b>0.020</b>                               | 29.15                             | 29.21                   | 28.33                   | 0.905                                      | 0.155                                      |
| 20     | 337.50                                 | 348.43                  | 326.93                  | 0.088                                      | 0.138                                      | 153.10                            | 155.06                  | 148.85                  | 0.238                                      | <b>0.038</b>                               | 31.82                             | 32.27                   | 31.47                   | 0.401                                      | 0.581                                      |
| 21     | 403.91                                 | 419.14                  | 393.77                  | <b>0.041</b>                               | 0.233                                      | 164.22                            | 167.06                  | 160.32                  | 0.101                                      | 0.075                                      | 34.56                             | 35.18                   | 34.49                   | 0.266                                      | 0.921                                      |
| 22     | 479.14                                 | 498.28                  | 469.61                  | <b>0.023</b>                               | 0.342                                      | 174.99                            | 178.42                  | 171.64                  | 0.052                                      | 0.149                                      | 37.34                             | 37.93                   | 37.35                   | 0.306                                      | 0.986                                      |
| 23     | 563.85                                 | 586.14                  | 555.07                  | <b>0.020</b>                               | 0.459                                      | 185.44                            | 189.14                  | 182.79                  | <b>0.040</b>                               | 0.280                                      | 40.12                             | 40.49                   | 40.02                   | 0.541                                      | 0.893                                      |
| 24     | 658.79                                 | 683.08                  | 650.86                  | <b>0.030</b>                               | 0.573                                      | 195.65                            | 199.31                  | 193.78                  | 0.053                                      | 0.476                                      | 42.88                             | 42.87                   | 42.51                   | 0.978                                      | 0.637                                      |
| 25     | 764.86                                 | 789.65                  | 757.81                  | 0.064                                      | 0.675                                      | 205.71                            | 209.05                  | 204.64                  | 0.104                                      | 0.705                                      | 45.59                             | 45.10                   | 44.83                   | 0.472                                      | 0.374                                      |
| 26     | 883.12                                 | 906.59                  | 876.94                  | 0.141                                      | 0.757                                      | 215.80                            | 218.55                  | 215.46                  | 0.217                                      | 0.911                                      | 48.20                             | 47.21                   | 47.01                   | 0.186                                      | 0.196                                      |
| 27     | 1014.91                                | 1035.03                 | 1009.55                 | 0.274                                      | 0.818                                      | 226.09                            | 228.04                  | 226.32                  | 0.408                                      | 0.944                                      | 50.69                             | 49.27                   | 49.12                   | 0.073                                      | 0.105                                      |
| 28     | 1161.88                                | 1176.48                 | 1157.30                 | 0.465                                      | 0.863                                      | 236.84                            | 237.81                  | 237.36                  | 0.679                                      | 0.876                                      | 53.00                             | 51.33                   | 51.21                   | <b>0.035</b>                               | 0.069                                      |
| 29     | 1325.66                                | 1332.84                 | 1321.76                 | 0.729                                      | 0.896                                      | 248.23                            | 248.15                  | 248.68                  | 0.970                                      | 0.897                                      | 55.12                             | 53.47                   | 53.34                   | <b>0.029</b>                               | 0.070                                      |
| 30     | 1506.06                                | 1505.00                 | 1502.34                 | 0.962                                      | 0.912                                      | 260.15                            | 259.07                  | 260.18                  | 0.625                                      | 0.994                                      | 57.07                             | 55.69                   | 55.51                   | 0.060                                      | 0.118                                      |
| 31     | 1701.57                                | 1693.18                 | 1696.84                 | 0.751                                      | 0.904                                      | 272.3                             | 270.46                  | 271.66                  | 0.446                                      | 0.869                                      | 58.88                             | 57.93                   | 57.71                   | 0.229                                      | 0.262                                      |
| 32     | 1909.43                                | 1897.20                 | 1901.60                 | 0.707                                      | 0.865                                      | 284.33                            | 282.17                  | 282.92                  | 0.436                                      | 0.736                                      | 60.63                             | 60.14                   | 59.90                   | 0.588                                      | 0.521                                      |
| 33     | 2125.50                                | 2116.46                 | 2111.29                 | 0.811                                      | 0.786                                      | 295.85                            | 294.03                  | 293.71                  | 0.549                                      | 0.632                                      | 62.37                             | 62.26                   | 62.07                   | 0.916                                      | 0.803                                      |
| 34     | 2344.21                                | 2349.80                 | 2318.86                 | 0.888                                      | 0.659                                      | 306.39                            | 305.84                  | 303.77                  | 0.856                                      | 0.570                                      | 64.18                             | 64.24                   | 64.18                   | 0.949                                      | 0.998                                      |
| 35     | 2562.92                                | 2595.01                 | 2516.84                 | 0.446                                      | 0.469                                      | 315.69                            | 317.37                  | 312.87                  | 0.568                                      | 0.554                                      | 66.11                             | 66.00                   | 66.20                   | 0.905                                      | 0.941                                      |
| 36     | 2784.87                                | 2844.17                 | 2709.98                 | 0.255                                      | 0.305                                      | 324.45                            | 328.39                  | 321.5                   | 0.253                                      | 0.568                                      | 68.09                             | 67.55                   | 68.04                   | 0.620                                      | 0.972                                      |
| 37     | 3015.66                                | 3083.73                 | 2914.06                 | 0.291                                      | 0.219                                      | 333.70                            | 338.62                  | 330.64                  | 0.230                                      | 0.585                                      | 69.99                             | 68.94                   | 69.55                   | 0.418                                      | 0.773                                      |
| 38     | 3263.23                                | 3296.78                 | 3150.31                 | 0.630                                      | 0.211                                      | 344.59                            | 347.80                  | 341.36                  | 0.447                                      | 0.580                                      | 71.68                             | 70.25                   | 70.59                   | 0.281                                      | 0.481                                      |
| 39     | 3538.17                                | 3464.08                 | 3446.96                 | 0.393                                      | 0.418                                      | 358.44                            | 355.64                  | 354.93                  | 0.570                                      | 0.604                                      | 73.02                             | 71.55                   | 71.01                   | 0.352                                      | 0.275                                      |
| 40     | 3854.39                                | 3565.81                 | 3842.83                 | 0.109                                      | 0.953                                      | 376.82                            | 361.85                  | 372.80                  | 0.144                                      | 0.724                                      | 73.85                             | 72.90                   | 70.66                   | 0.772                                      | 0.345                                      |

Supplementary Table S7B. Back-transformed and pairwise comparison of weekly fetal growth biometrics across sum of even-chain saturated fatty acids tertiles in the NICHD Fetal Growth Studies-Singletons

| G<br>W | Head circumference, mm     |                         |                         |                                            |                                            | Biparietal diameter, mm    |                         |                         |                                            |                                            | HC/AC ratio                |                         |                         |                                            |                                            |
|--------|----------------------------|-------------------------|-------------------------|--------------------------------------------|--------------------------------------------|----------------------------|-------------------------|-------------------------|--------------------------------------------|--------------------------------------------|----------------------------|-------------------------|-------------------------|--------------------------------------------|--------------------------------------------|
|        | Back-transformed geometric |                         |                         | Wald test for pairwise                     |                                            | Back-transformed geometric |                         |                         | Wald test for pairwise                     |                                            | Back-transformed geometric |                         |                         | Wald test for pairwise                     |                                            |
|        | mean                       |                         |                         | comparison                                 |                                            | mean mm                    |                         |                         | comparison                                 |                                            | mean                       |                         |                         | comparison                                 |                                            |
|        | 1 <sup>st</sup> tertile    | 2 <sup>nd</sup> tertile | 3 <sup>rd</sup> tertile | 2 <sup>nd</sup> vs 1 <sup>st</sup> tertile | 3 <sup>rd</sup> vs 1 <sup>st</sup> tertile | 1 <sup>st</sup> tertile    | 2 <sup>nd</sup> tertile | 3 <sup>rd</sup> tertile | 2 <sup>nd</sup> vs 1 <sup>st</sup> tertile | 3 <sup>rd</sup> vs 1 <sup>st</sup> tertile | 1 <sup>st</sup> tertile    | 2 <sup>nd</sup> tertile | 3 <sup>rd</sup> tertile | 2 <sup>nd</sup> vs 1 <sup>st</sup> tertile | 3 <sup>rd</sup> vs 1 <sup>st</sup> tertile |
| 10     | 47.46                      | 55.48                   | 46.80                   | <0.001                                     | 0.692                                      | 11.84                      | 13.43                   | 11.90                   | 0.007                                      | 0.908                                      | 1.38                       | 1.24                    | 1.26                    | 0.007                                      | 0.024                                      |
| 11     | 59.35                      | 64.72                   | 58.32                   | <0.0001                                    | 0.383                                      | 15.32                      | 16.58                   | 15.26                   | 0.001                                      | 0.867                                      | 1.33                       | 1.25                    | 1.26                    | 0.002                                      | 0.007                                      |
| 12     | 72.05                      | 74.98                   | 70.68                   | <0.0001                                    | 0.111                                      | 19.05                      | 19.97                   | 18.88                   | <0.0001                                    | 0.431                                      | 1.29                       | 1.26                    | 1.25                    | 0.003                                      | 0.003                                      |
| 13     | 85.18                      | 86.21                   | 83.55                   | 0.150                                      | 0.071                                      | 22.86                      | 23.54                   | 22.62                   | 0.002                                      | 0.232                                      | 1.26                       | 1.25                    | 1.24                    | 0.663                                      | 0.225                                      |
| 14     | 98.40                      | 98.34                   | 96.62                   | 0.949                                      | 0.117                                      | 26.63                      | 27.20                   | 26.37                   | 0.059                                      | 0.342                                      | 1.22                       | 1.24                    | 1.23                    | 0.160                                      | 0.409                                      |
| 15     | 111.44                     | 111.22                  | 109.65                  | 0.853                                      | 0.176                                      | 30.24                      | 30.89                   | 30.02                   | 0.072                                      | 0.504                                      | 1.2                        | 1.23                    | 1.22                    | 0.017                                      | 0.037                                      |
| 16     | 124.12                     | 124.66                  | 122.48                  | 0.653                                      | 0.246                                      | 33.65                      | 34.53                   | 33.54                   | 0.016                                      | 0.738                                      | 1.18                       | 1.21                    | 1.21                    | 0.002                                      | 0.003                                      |
| 17     | 136.43                     | 138.4                   | 135.06                  | 0.098                                      | 0.357                                      | 36.87                      | 38.11                   | 36.91                   | 0.001                                      | 0.915                                      | 1.16                       | 1.19                    | 1.2                     | <0.001                                     | <0.0001                                    |
| 18     | 148.47                     | 152.13                  | 147.46                  | 0.004                                      | 0.530                                      | 39.96                      | 41.59                   | 40.18                   | <0.0001                                    | 0.560                                      | 1.14                       | 1.18                    | 1.18                    | <0.001                                     | <0.0001                                    |
| 19     | 160.44                     | 165.5                   | 159.77                  | <0.001                                     | 0.702                                      | 43.04                      | 44.99                   | 43.41                   | <0.0001                                    | 0.368                                      | 1.13                       | 1.16                    | 1.17                    | 0.002                                      | <0.0001                                    |
| 20     | 172.35                     | 178.35                  | 171.90                  | 0.0001                                     | 0.811                                      | 46.13                      | 48.28                   | 46.58                   | <0.0001                                    | 0.305                                      | 1.13                       | 1.15                    | 1.16                    | 0.010                                      | 0.0001                                     |
| 21     | 184.13                     | 190.58                  | 183.78                  | <0.0001                                    | 0.859                                      | 49.21                      | 51.45                   | 49.66                   | <0.0001                                    | 0.314                                      | 1.12                       | 1.14                    | 1.15                    | 0.033                                      | 0.001                                      |
| 22     | 195.71                     | 202.15                  | 195.34                  | <0.0001                                    | 0.859                                      | 52.26                      | 54.48                   | 52.66                   | <0.0001                                    | 0.393                                      | 1.12                       | 1.13                    | 1.14                    | 0.097                                      | 0.008                                      |
| 23     | 207.04                     | 213.06                  | 206.55                  | <0.001                                     | 0.825                                      | 55.29                      | 57.39                   | 55.57                   | <0.0001                                    | 0.562                                      | 1.12                       | 1.13                    | 1.13                    | 0.249                                      | 0.070                                      |
| 24     | 218.08                     | 223.37                  | 217.41                  | 0.003                                      | 0.775                                      | 58.27                      | 60.18                   | 58.39                   | <0.001                                     | 0.818                                      | 1.12                       | 1.12                    | 1.12                    | 0.507                                      | 0.389                                      |
| 25     | 228.81                     | 233.17                  | 227.92                  | 0.021                                      | 0.724                                      | 61.20                      | 62.88                   | 61.13                   | 0.003                                      | 0.903                                      | 1.11                       | 1.12                    | 1.11                    | 0.768                                      | 0.982                                      |
| 26     | 239.23                     | 242.63                  | 238.13                  | 0.097                                      | 0.684                                      | 64.08                      | 65.51                   | 63.81                   | 0.020                                      | 0.668                                      | 1.11                       | 1.11                    | 1.1                     | 0.908                                      | 0.554                                      |
| 27     | 249.34                     | 251.91                  | 248.10                  | 0.230                                      | 0.663                                      | 66.9                       | 68.13                   | 66.46                   | 0.058                                      | 0.499                                      | 1.1                        | 1.1                     | 1.09                    | 0.876                                      | 0.333                                      |
| 28     | 259.16                     | 261.25                  | 257.91                  | 0.326                                      | 0.670                                      | 69.68                      | 70.77                   | 69.10                   | 0.087                                      | 0.390                                      | 1.09                       | 1.1                     | 1.09                    | 0.632                                      | 0.273                                      |
| 29     | 268.72                     | 270.85                  | 267.62                  | 0.288                                      | 0.716                                      | 72.39                      | 73.49                   | 71.76                   | 0.071                                      | 0.338                                      | 1.08                       | 1.09                    | 1.08                    | 0.237                                      | 0.372                                      |
| 30     | 277.91                     | 280.57                  | 277.13                  | 0.175                                      | 0.803                                      | 75.03                      | 76.24                   | 74.41                   | 0.042                                      | 0.356                                      | 1.07                       | 1.08                    | 1.07                    | 0.035                                      | 0.757                                      |
| 31     | 286.60                     | 290.11                  | 286.25                  | 0.099                                      | 0.916                                      | 77.54                      | 78.93                   | 76.99                   | 0.031                                      | 0.448                                      | 1.05                       | 1.07                    | 1.06                    | 0.006                                      | 0.653                                      |
| 32     | 294.65                     | 299.14                  | 294.79                  | 0.063                                      | 0.968                                      | 79.88                      | 81.48                   | 79.45                   | 0.029                                      | 0.583                                      | 1.04                       | 1.06                    | 1.04                    | 0.003                                      | 0.282                                      |
| 33     | 301.92                     | 307.27                  | 302.54                  | 0.039                                      | 0.867                                      | 82.02                      | 83.78                   | 81.71                   | 0.024                                      | 0.717                                      | 1.02                       | 1.04                    | 1.03                    | 0.003                                      | 0.127                                      |
| 34     | 308.26                     | 314.10                  | 309.28                  | 0.020                                      | 0.786                                      | 83.90                      | 85.72                   | 83.72                   | 0.017                                      | 0.832                                      | 1.01                       | 1.03                    | 1.02                    | 0.007                                      | 0.071                                      |
| 35     | 313.67                     | 319.28                  | 314.84                  | 0.022                                      | 0.763                                      | 85.51                      | 87.21                   | 85.41                   | 0.023                                      | 0.903                                      | 0.99                       | 1.01                    | 1.01                    | 0.089                                      | 0.083                                      |
| 36     | 318.40                     | 323.00                  | 319.35                  | 0.102                                      | 0.820                                      | 86.94                      | 88.30                   | 86.90                   | 0.114                                      | 0.965                                      | 0.98                       | 0.98                    | 0.99                    | 0.701                                      | 0.175                                      |
| 37     | 322.77                     | 325.81                  | 323.14                  | 0.352                                      | 0.933                                      | 88.26                      | 89.19                   | 88.40                   | 0.351                                      | 0.895                                      | 0.97                       | 0.96                    | 0.98                    | 0.712                                      | 0.231                                      |
| 38     | 327.11                     | 328.30                  | 326.61                  | 0.720                                      | 0.912                                      | 89.57                      | 90.08                   | 90.16                   | 0.617                                      | 0.592                                      | 0.95                       | 0.94                    | 0.96                    | 0.698                                      | 0.136                                      |
| 39     | 331.78                     | 331.08                  | 330.12                  | 0.860                                      | 0.751                                      | 90.97                      | 91.17                   | 92.43                   | 0.874                                      | 0.291                                      | 0.92                       | 0.93                    | 0.94                    | 0.563                                      | 0.083                                      |
| 40     | 337.15                     | 334.79                  | 334.11                  | 0.764                                      | 0.714                                      | 92.56                      | 92.66                   | 95.49                   | 0.969                                      | 0.269                                      | 0.9                        | 0.93                    | 0.93                    | 0.164                                      | 0.167                                      |

HC/AC ratio, head circumference/abdominal circumference ratio.

Supplementary Table S8A. Back-transformed and pairwise comparison of weekly fetal growth biometrics across Heptadecanoic acid (17:0) tertiles in the NICHD Fetal Growth Studies-Singletons

| G<br>W | Estimated fetal weight, g              |                         |                         |                                               |                                               | Abdominal circumference, mm       |                            |                            |                                               |                                               | Femur length, mm                  |                            |                         |                                               |                                               |
|--------|----------------------------------------|-------------------------|-------------------------|-----------------------------------------------|-----------------------------------------------|-----------------------------------|----------------------------|----------------------------|-----------------------------------------------|-----------------------------------------------|-----------------------------------|----------------------------|-------------------------|-----------------------------------------------|-----------------------------------------------|
|        | <u>Back-transformed geometric mean</u> |                         |                         | <u>Wald test for pairwise</u>                 |                                               | <u>Back-transformed geometric</u> |                            |                            | <u>Wald test for pairwise</u>                 |                                               | <u>Back-transformed geometric</u> |                            |                         | <u>Wald test for pairwise</u>                 |                                               |
|        | gram                                   |                         |                         | comparison                                    |                                               | mean mm                           |                            |                            | comparison                                    |                                               | mean mm                           |                            |                         | comparison                                    |                                               |
|        | 1 <sup>st</sup> tertile                | 2 <sup>nd</sup> tertile | 3 <sup>rd</sup> tertile | 2 <sup>nd</sup> vs 1 <sup>st</sup><br>p value | 3 <sup>rd</sup> vs 1 <sup>st</sup><br>p value | 1 <sup>st</sup><br>tertile        | 2 <sup>nd</sup><br>tertile | 3 <sup>rd</sup><br>tertile | 2 <sup>nd</sup> vs 1 <sup>st</sup><br>p value | 3 <sup>rd</sup> vs 1 <sup>st</sup><br>p value | 1 <sup>st</sup><br>tertile        | 2 <sup>nd</sup><br>tertile | 3 <sup>rd</sup> tertile | 2 <sup>nd</sup> vs 1 <sup>st</sup><br>p value | 3 <sup>rd</sup> vs 1 <sup>st</sup><br>p value |
| 10     | 32.59                                  | 34.34                   | 37.61                   | 0.382                                         | 0.103                                         | 38.57                             | 35.61                      | 40.28                      | <b>0.006</b>                                  | 0.390                                         | 2.25                              | 2.38                       | 2.91                    | 0.302                                         | <b>0.001</b>                                  |
| 11     | 42.65                                  | 43.47                   | 45.73                   | 0.572                                         | 0.146                                         | 47.75                             | 45.41                      | 48.52                      | <b>0.006</b>                                  | 0.569                                         | 4.07                              | 4.07                       | 4.55                    | 0.982                                         | <b>0.010</b>                                  |
| 12     | 55.36                                  | 55.24                   | 56.58                   | 0.918                                         | 0.379                                         | 57.77                             | 56.21                      | 57.77                      | <b>0.045</b>                                  | 0.998                                         | 6.54                              | 6.38                       | 6.69                    | 0.286                                         | 0.379                                         |
| 13     | 71.25                                  | 70.33                   | 70.92                   | 0.483                                         | 0.815                                         | 68.45                             | 67.71                      | 68.01                      | 0.411                                         | 0.601                                         | 9.54                              | 9.25                       | 9.30                    | 0.166                                         | 0.212                                         |
| 14     | 90.93                                  | 89.50                   | 89.66                   | 0.434                                         | 0.544                                         | 79.60                             | 79.63                      | 79.14                      | 0.978                                         | 0.678                                         | 12.8                              | 12.52                      | 12.29                   | 0.344                                         | 0.070                                         |
| 15     | 115.06                                 | 113.61                  | 113.85                  | 0.547                                         | 0.669                                         | 91.07                             | 91.7                       | 91.06                      | 0.614                                         | 0.994                                         | 16.05                             | 16.00                      | 15.54                   | 0.896                                         | 0.162                                         |
| 16     | 144.33                                 | 143.51                  | 144.53                  | 0.789                                         | 0.955                                         | 102.71                            | 103.71                     | 103.57                     | 0.478                                         | 0.553                                         | 19.12                             | 19.48                      | 18.93                   | 0.397                                         | 0.644                                         |
| 17     | 179.47                                 | 180.03                  | 182.66                  | 0.884                                         | 0.454                                         | 114.46                            | 115.53                     | 116.45                     | 0.492                                         | 0.190                                         | 21.99                             | 22.83                      | 22.34                   | 0.082                                         | 0.438                                         |
| 18     | 221.18                                 | 223.78                  | 228.8                   | 0.604                                         | 0.153                                         | 126.3                             | 127.15                     | 129.44                     | 0.624                                         | 0.057                                         | 24.80                             | 26.00                      | 25.70                   | <b>0.027</b>                                  | 0.068                                         |
| 19     | 270.2                                  | 275.06                  | 282.85                  | 0.448                                         | 0.062                                         | 138.21                            | 138.65                     | 142.23                     | 0.818                                         | <b>0.028</b>                                  | 27.67                             | 29.05                      | 29.00                   | <b>0.022</b>                                  | <b>0.016</b>                                  |
| 20     | 327.34                                 | 334.24                  | 344.72                  | 0.387                                         | <b>0.041</b>                                  | 150.09                            | 150.03                     | 154.61                     | 0.977                                         | <b>0.024</b>                                  | 30.59                             | 32.05                      | 32.21                   | <b>0.026</b>                                  | <b>0.008</b>                                  |
| 21     | 393.41                                 | 401.81                  | 414.71                  | 0.388                                         | <b>0.041</b>                                  | 161.88                            | 161.25                     | 166.50                     | 0.780                                         | <b>0.032</b>                                  | 33.51                             | 34.96                      | 35.27                   | <b>0.041</b>                                  | <b>0.007</b>                                  |
| 22     | 469.24                                 | 478.23                  | 493.20                  | 0.445                                         | 0.058                                         | 173.51                            | 172.25                     | 177.86                     | 0.605                                         | 0.058                                         | 36.41                             | 37.75                      | 38.15                   | 0.076                                         | <b>0.011</b>                                  |
| 23     | 555.66                                 | 563.93                  | 580.65                  | 0.562                                         | 0.101                                         | 184.96                            | 183.05                     | 188.71                     | 0.464                                         | 0.123                                         | 39.25                             | 40.39                      | 40.83                   | 0.153                                         | <b>0.029</b>                                  |
| 24     | 653.54                                 | 659.33                  | 677.70                  | 0.738                                         | 0.189                                         | 196.23                            | 193.65                     | 199.14                     | 0.361                                         | 0.261                                         | 42.02                             | 42.90                      | 43.31                   | 0.299                                         | 0.094                                         |
| 25     | 763.76                                 | 764.89                  | 785.25                  | 0.957                                         | 0.333                                         | 207.32                            | 204.12                     | 209.28                     | 0.292                                         | 0.482                                         | 44.69                             | 45.28                      | 45.61                   | 0.515                                         | 0.266                                         |
| 26     | 887.22                                 | 881.11                  | 904.59                  | 0.810                                         | 0.515                                         | 218.30                            | 214.55                     | 219.34                     | 0.250                                         | 0.730                                         | 47.25                             | 47.56                      | 47.77                   | 0.753                                         | 0.560                                         |
| 27     | 1024.86                                | 1008.58                 | 1037.48                 | 0.590                                         | 0.690                                         | 229.24                            | 225.04                     | 229.54                     | 0.228                                         | 0.925                                         | 49.70                             | 49.76                      | 49.84                   | 0.950                                         | 0.877                                         |
| 28     | 1177.69                                | 1148.06                 | 1186.36                 | 0.401                                         | 0.814                                         | 240.24                            | 235.74                     | 240.19                     | 0.223                                         | 0.987                                         | 52.03                             | 51.95                      | 51.91                   | 0.940                                         | 0.898                                         |
| 29     | 1346.25                                | 1300.4                  | 1354.01                 | 0.260                                         | 0.856                                         | 251.36                            | 246.79                     | 251.56                     | 0.242                                         | 0.953                                         | 54.25                             | 54.16                      | 54.02                   | 0.940                                         | 0.819                                         |
| 30     | 1529.87                                | 1466.2                  | 1540.62                 | 0.177                                         | 0.828                                         | 262.51                            | 258.13                     | 263.57                     | 0.289                                         | 0.768                                         | 56.36                             | 56.39                      | 56.19                   | 0.979                                         | 0.863                                         |
| 31     | 1727.00                                | 1645.99                 | 1744.17                 | 0.141                                         | 0.766                                         | 273.59                            | 269.6                      | 275.92                     | 0.365                                         | 0.545                                         | 58.39                             | 58.58                      | 58.36                   | 0.878                                         | 0.978                                         |
| 32     | 1935.12                                | 1840.28                 | 1960.83                 | 0.138                                         | 0.703                                         | 284.48                            | 281.03                     | 288.25                     | 0.464                                         | 0.365                                         | 60.37                             | 60.66                      | 60.51                   | 0.818                                         | 0.904                                         |
| 33     | 2150.69                                | 2049.66                 | 2184.69                 | 0.169                                         | 0.662                                         | 295.04                            | 292.23                     | 300.14                     | 0.573                                         | 0.253                                         | 62.30                             | 62.56                      | 62.56                   | 0.849                                         | 0.836                                         |
| 34     | 2369.05                                | 2274.72                 | 2407.58                 | 0.254                                         | 0.659                                         | 305.13                            | 302.96                     | 311.13                     | 0.678                                         | 0.196                                         | 64.24                             | 64.20                      | 64.47                   | 0.979                                         | 0.856                                         |
| 35     | 2586.22                                | 2514.06                 | 2620.21                 | 0.439                                         | 0.725                                         | 314.66                            | 313.07                     | 320.73                     | 0.772                                         | 0.201                                         | 66.17                             | 65.52                      | 66.18                   | 0.654                                         | 0.995                                         |
| 36     | 2802.81                                | 2756.41                 | 2823.32                 | 0.664                                         | 0.850                                         | 323.72                            | 322.97                     | 329.24                     | 0.899                                         | 0.275                                         | 67.97                             | 66.70                      | 67.70                   | 0.416                                         | 0.849                                         |
| 37     | 3021.47                                | 2983.93                 | 3026.75                 | 0.756                                         | 0.966                                         | 332.42                            | 333.37                     | 337.65                     | 0.878                                         | 0.343                                         | 69.44                             | 68.09                      | 69.11                   | 0.420                                         | 0.833                                         |
| 38     | 3246.42                                | 3174.46                 | 3244.36                 | 0.581                                         | 0.988                                         | 340.93                            | 345.05                     | 347.12                     | 0.524                                         | 0.287                                         | 70.38                             | 70.06                      | 70.50                   | 0.851                                         | 0.945                                         |
| 39     | 3483.48                                | 3303.28                 | 3494.27                 | 0.216                                         | 0.943                                         | 349.41                            | 358.93                     | 358.93                     | 0.169                                         | 0.129                                         | 70.61                             | 73.05                      | 71.97                   | 0.186                                         | 0.440                                         |
| 40     | 3740.33                                | 3346.37                 | 3800.12                 | 0.060                                         | 0.765                                         | 358.06                            | 376.06                     | 374.55                     | 0.039                                         | 0.069                                         | 69.92                             | 77.58                      | 73.62                   | <b>0.005</b>                                  | 0.153                                         |

Supplementary Table S8B. Back-transformed and pairwise comparison of weekly fetal growth biometrics across Heptadecanoic acid (17:0) tertiles in the NICHD Fetal Growth Studies-Singletons

| G<br>W | Head circumference, mm     |                            |                         |                                               |                                            | Biparietal diameter, mm    |                         |                            |                                               |                                               | HC/AC ratio                |                            |                         |                                               |                                            |
|--------|----------------------------|----------------------------|-------------------------|-----------------------------------------------|--------------------------------------------|----------------------------|-------------------------|----------------------------|-----------------------------------------------|-----------------------------------------------|----------------------------|----------------------------|-------------------------|-----------------------------------------------|--------------------------------------------|
|        | Back-transformed geometric |                            |                         | Wald test for pairwise                        |                                            | Back-transformed geometric |                         |                            | Wald test for pairwise                        |                                               | Back-transformed geometric |                            |                         | Wald test for pairwise                        |                                            |
|        | mean                       |                            |                         | comparison                                    |                                            | mean mm                    |                         |                            | comparison                                    |                                               | mean                       |                            |                         | comparison                                    |                                            |
|        | mm                         |                            |                         | p value                                       |                                            |                            |                         |                            | p value                                       |                                               |                            |                            |                         | p value                                       |                                            |
|        | 1 <sup>st</sup><br>tertile | 2 <sup>nd</sup><br>tertile | 3 <sup>rd</sup> tertile | 2 <sup>nd</sup> vs 1 <sup>st</sup><br>tertile | 3 <sup>rd</sup> vs 1 <sup>st</sup> tertile | 1 <sup>st</sup><br>tertile | 2 <sup>nd</sup> tertile | 3 <sup>rd</sup><br>tertile | 2 <sup>nd</sup> vs 1 <sup>st</sup><br>tertile | 3 <sup>rd</sup> vs 1 <sup>st</sup><br>tertile | 1 <sup>st</sup><br>tertile | 2 <sup>nd</sup><br>tertile | 3 <sup>rd</sup> tertile | 2 <sup>nd</sup> vs 1 <sup>st</sup><br>tertile | 3 <sup>rd</sup> vs 1 <sup>st</sup> tertile |
| 10     | 49.54                      | 46.49                      | 53.20                   | <b>0.020</b>                                  | 0.112                                      | 11.94                      | 11.71                   | 13.06                      | 0.570                                         | 0.068                                         | 1.25                       | 1.29                       | 1.31                    | 0.342                                         | 0.308                                      |
| 11     | 61.07                      | 58.41                      | 62.73                   | <b>0.005</b>                                  | 0.263                                      | 15.59                      | 15.32                   | 16.03                      | 0.349                                         | 0.284                                         | 1.27                       | 1.28                       | 1.29                    | 0.614                                         | 0.501                                      |
| 12     | 73.33                      | 71.21                      | 73.20                   | <b>0.004</b>                                  | 0.873                                      | 19.46                      | 19.20                   | 19.26                      | 0.139                                         | 0.389                                         | 1.27                       | 1.26                       | 1.26                    | 0.509                                         | 0.681                                      |
| 13     | 86.00                      | 84.48                      | 84.52                   | 0.064                                         | <b>0.041</b>                               | 23.40                      | 23.15                   | 22.69                      | 0.187                                         | <b>0.001</b>                                  | 1.26                       | 1.25                       | 1.24                    | 0.061                                         | <b>0.030</b>                               |
| 14     | 98.81                      | 97.89                      | 96.61                   | 0.356                                         | <b>0.027</b>                               | 27.22                      | 27.03                   | 26.27                      | 0.428                                         | <b>0.001</b>                                  | 1.25                       | 1.23                       | 1.22                    | 0.054                                         | <b>0.015</b>                               |
| 15     | 111.52                     | 111.13                     | 109.33                  | 0.732                                         | 0.068                                      | 30.83                      | 30.71                   | 29.91                      | 0.662                                         | <b>0.009</b>                                  | 1.23                       | 1.21                       | 1.20                    | 0.092                                         | <b>0.015</b>                               |
| 16     | 124.00                     | 124.02                     | 122.52                  | 0.983                                         | 0.243                                      | 34.20                      | 34.14                   | 33.58                      | 0.856                                         | 0.095                                         | 1.21                       | 1.20                       | 1.18                    | 0.210                                         | <b>0.016</b>                               |
| 17     | 136.21                     | 136.52                     | 135.98                  | 0.819                                         | 0.859                                      | 37.35                      | 37.34                   | 37.21                      | 0.981                                         | 0.698                                         | 1.19                       | 1.18                       | 1.17                    | 0.554                                         | <b>0.027</b>                               |
| 18     | 148.25                     | 148.72                     | 149.51                  | 0.752                                         | 0.357                                      | 40.41                      | 40.40                   | 40.77                      | 0.989                                         | 0.356                                         | 1.17                       | 1.17                       | 1.15                    | 0.949                                         | 0.077                                      |
| 19     | 160.15                     | 160.82                     | 162.86                  | 0.686                                         | 0.073                                      | 43.45                      | 43.45                   | 44.26                      | 0.984                                         | 0.061                                         | 1.16                       | 1.16                       | 1.14                    | 0.561                                         | 0.214                                      |
| 20     | 171.85                     | 172.83                     | 175.87                  | 0.584                                         | <b>0.015</b>                               | 46.46                      | 46.53                   | 47.65                      | 0.854                                         | <b>0.011</b>                                  | 1.14                       | 1.15                       | 1.14                    | 0.301                                         | 0.464                                      |
| 21     | 183.29                     | 184.67                     | 188.41                  | 0.470                                         | <b>0.003</b>                               | 49.42                      | 49.61                   | 50.92                      | 0.651                                         | <b>0.002</b>                                  | 1.13                       | 1.14                       | 1.13                    | 0.141                                         | 0.813                                      |
| 22     | 194.44                     | 196.27                     | 200.43                  | 0.365                                         | <b>0.001</b>                               | 52.35                      | 52.69                   | 54.07                      | 0.424                                         | <b>0.001</b>                                  | 1.12                       | 1.14                       | 1.13                    | 0.059                                         | 0.795                                      |
| 23     | 205.29                     | 207.57                     | 211.90                  | 0.287                                         | <b>&lt;0.001</b>                           | 55.22                      | 55.73                   | 57.08                      | 0.247                                         | <b>&lt;0.001</b>                              | 1.12                       | 1.13                       | 1.12                    | <b>0.028</b>                                  | 0.466                                      |
| 24     | 215.86                     | 218.55                     | 222.82                  | 0.242                                         | <b>0.001</b>                               | 58.04                      | 58.73                   | 59.97                      | 0.152                                         | <b>&lt;0.001</b>                              | 1.11                       | 1.13                       | 1.12                    | <b>0.021</b>                                  | 0.274                                      |
| 25     | 226.18                     | 229.17                     | 233.23                  | 0.229                                         | <b>0.001</b>                               | 60.83                      | 61.66                   | 62.76                      | 0.115                                         | <b>0.001</b>                                  | 1.10                       | 1.12                       | 1.11                    | <b>0.025</b>                                  | 0.196                                      |
| 26     | 236.34                     | 239.43                     | 243.24                  | 0.247                                         | <b>0.003</b>                               | 63.60                      | 64.51                   | 65.46                      | 0.110                                         | <b>0.004</b>                                  | 1.10                       | 1.12                       | 1.11                    | <b>0.034</b>                                  | 0.183                                      |
| 27     | 246.41                     | 249.34                     | 252.95                  | 0.303                                         | <b>0.009</b>                               | 66.35                      | 67.27                   | 68.13                      | 0.131                                         | <b>0.009</b>                                  | 1.09                       | 1.11                       | 1.10                    | <b>0.045</b>                                  | 0.214                                      |
| 28     | 256.53                     | 258.94                     | 262.52                  | 0.419                                         | <b>0.019</b>                               | 69.12                      | 69.92                   | 70.80                      | 0.195                                         | <b>0.016</b>                                  | 1.09                       | 1.10                       | 1.09                    | 0.052                                         | 0.310                                      |
| 29     | 266.71                     | 268.25                     | 272.09                  | 0.619                                         | <b>0.034</b>                               | 71.91                      | 72.47                   | 73.51                      | 0.366                                         | <b>0.019</b>                                  | 1.08                       | 1.09                       | 1.08                    | 0.060                                         | 0.582                                      |
| 30     | 276.73                     | 277.23                     | 281.54                  | 0.879                                         | 0.063                                      | 74.67                      | 74.90                   | 76.24                      | 0.715                                         | <b>0.023</b>                                  | 1.07                       | 1.08                       | 1.07                    | 0.103                                         | 0.854                                      |
| 31     | 286.32                     | 285.79                     | 290.65                  | 0.879                                         | 0.120                                      | 77.33                      | 77.23                   | 78.90                      | 0.882                                         | <b>0.035</b>                                  | 1.06                       | 1.07                       | 1.05                    | 0.236                                         | 0.345                                      |
| 32     | 295.20                     | 293.88                     | 299.14                  | 0.723                                         | 0.196                                      | 79.82                      | 79.47                   | 81.42                      | 0.635                                         | 0.054                                         | 1.05                       | 1.05                       | 1.04                    | 0.449                                         | 0.140                                      |
| 33     | 303.04                     | 301.44                     | 306.75                  | 0.681                                         | 0.255                                      | 82.08                      | 81.65                   | 83.69                      | 0.578                                         | 0.069                                         | 1.03                       | 1.04                       | 1.02                    | 0.660                                         | 0.072                                      |
| 34     | 309.51                     | 308.38                     | 313.17                  | 0.780                                         | 0.267                                      | 84.03                      | 83.77                   | 85.64                      | 0.745                                         | 0.073                                         | 1.02                       | 1.02                       | 1.01                    | 0.841                                         | 0.050                                      |
| 35     | 314.50                     | 314.67                     | 318.16                  | 0.967                                         | 0.266                                      | 85.62                      | 85.85                   | 87.16                      | 0.771                                         | 0.079                                         | 1.00                       | 1.00                       | 0.99                    | 0.986                                         | 0.080                                      |
| 36     | 318.37                     | 320.37                     | 321.98                  | 0.652                                         | 0.309                                      | 86.92                      | 87.81                   | 88.34                      | 0.338                                         | 0.136                                         | 0.99                       | 0.99                       | 0.98                    | 0.983                                         | 0.298                                      |
| 37     | 321.59                     | 325.59                     | 325.22                  | 0.394                                         | 0.354                                      | 88.02                      | 89.54                   | 89.35                      | 0.143                                         | 0.212                                         | 0.97                       | 0.97                       | 0.97                    | 0.790                                         | 0.668                                      |
| 38     | 324.64                     | 330.44                     | 328.51                  | 0.229                                         | 0.340                                      | 89.00                      | 90.91                   | 90.38                      | 0.059                                         | 0.213                                         | 0.95                       | 0.96                       | 0.95                    | 0.355                                         | 0.856                                      |
| 39     | 328.04                     | 335.05                     | 332.50                  | 0.165                                         | 0.301                                      | 89.96                      | 91.81                   | 91.62                      | 0.108                                         | 0.163                                         | 0.93                       | 0.95                       | 0.93                    | 0.084                                         | 0.710                                      |
| 40     | 332.33                     | 339.57                     | 337.89                  | 0.266                                         | 0.412                                      | 91.01                      | 92.10                   | 93.27                      | 0.628                                         | 0.250                                         | 0.91                       | 0.94                       | 0.90                    | 0.163                                         | 0.505                                      |

HC/AC ratio, head circumference/abdominal circumference ratio.

**Supplementary Table S9A. Back-transformed and pairwise comparison of weekly fetal growth biometrics across sum of odd-chain saturated fatty acids tertiles in the NICHD Fetal Growth Studies-Singletons**

| G<br>W | Estimated fetal weight, g              |                         |                         |                                               |                                               | Femur length, mm                  |                         |                            |                                               |                                            |
|--------|----------------------------------------|-------------------------|-------------------------|-----------------------------------------------|-----------------------------------------------|-----------------------------------|-------------------------|----------------------------|-----------------------------------------------|--------------------------------------------|
|        | <u>Back-transformed geometric mean</u> |                         |                         | <u>Wald test for pairwise</u>                 |                                               | <u>Back-transformed geometric</u> |                         |                            | <u>Wald test for pairwise</u>                 |                                            |
|        | gram                                   |                         |                         | <u>comparison</u>                             |                                               | <u>mean mm</u>                    |                         |                            | <u>comparison</u>                             |                                            |
|        | 1 <sup>st</sup> tertile                | 2 <sup>nd</sup> tertile | 3 <sup>rd</sup> tertile | p value                                       |                                               |                                   |                         |                            | p value                                       |                                            |
|        |                                        |                         |                         | 2 <sup>nd</sup> vs 1 <sup>st</sup><br>tertile | 3 <sup>rd</sup> vs 1 <sup>st</sup><br>tertile | 1 <sup>st</sup><br>tertile        | 2 <sup>nd</sup> tertile | 3 <sup>rd</sup><br>tertile | 2 <sup>nd</sup> vs 1 <sup>st</sup><br>tertile | 3 <sup>rd</sup> vs 1 <sup>st</sup> tertile |
| 10     | 33.60                                  | 35.77                   | 36.09                   | 0.362                                         | 0.283                                         | 2.33                              | 2.61                    | 2.50                       | 0.092                                         | 0.195                                      |
| 11     | 43.44                                  | 44.38                   | 45.41                   | 0.577                                         | 0.234                                         | 4.11                              | 4.27                    | 4.28                       | 0.298                                         | 0.220                                      |
| 12     | 55.86                                  | 55.74                   | 57.46                   | 0.927                                         | 0.188                                         | 6.51                              | 6.50                    | 6.69                       | 0.925                                         | 0.276                                      |
| 13     | 71.42                                  | 70.62                   | 72.91                   | 0.559                                         | 0.258                                         | 9.43                              | 9.23                    | 9.65                       | 0.313                                         | 0.323                                      |
| 14     | 90.75                                  | 89.89                   | 92.58                   | 0.646                                         | 0.315                                         | 12.64                             | 12.36                   | 12.97                      | 0.307                                         | 0.269                                      |
| 15     | 114.54                                 | 114.52                  | 117.36                  | 0.994                                         | 0.237                                         | 15.92                             | 15.73                   | 16.45                      | 0.598                                         | 0.152                                      |
| 16     | 143.52                                 | 145.51                  | 148.15                  | 0.510                                         | 0.109                                         | 19.06                             | 19.17                   | 19.88                      | 0.795                                         | 0.060                                      |
| 17     | 178.43                                 | 183.67                  | 185.81                  | 0.157                                         | <b>0.032</b>                                  | 22.03                             | 22.56                   | 23.14                      | 0.246                                         | <b>0.022</b>                               |
| 18     | 220.00                                 | 229.47                  | 230.98                  | <b>0.042</b>                                  | <b>0.009</b>                                  | 24.89                             | 25.86                   | 26.23                      | 0.064                                         | <b>0.013</b>                               |
| 19     | 268.98                                 | 282.86                  | 283.92                  | <b>0.016</b>                                  | <b>0.004</b>                                  | 27.8                              | 29.08                   | 29.25                      | <b>0.030</b>                                  | <b>0.015</b>                               |
| 20     | 326.17                                 | 344.02                  | 344.94                  | <b>0.011</b>                                  | <b>0.004</b>                                  | 30.75                             | 32.22                   | 32.25                      | <b>0.022</b>                                  | <b>0.022</b>                               |
| 21     | 392.40                                 | 413.33                  | 414.55                  | <b>0.011</b>                                  | <b>0.004</b>                                  | 33.70                             | 35.24                   | 35.18                      | <b>0.025</b>                                  | <b>0.036</b>                               |
| 22     | 468.49                                 | 491.12                  | 493.32                  | <b>0.019</b>                                  | <b>0.007</b>                                  | 36.62                             | 38.10                   | 38.02                      | <b>0.040</b>                                  | 0.065                                      |
| 23     | 555.25                                 | 577.82                  | 581.86                  | <b>0.045</b>                                  | <b>0.013</b>                                  | 39.48                             | 40.78                   | 40.73                      | 0.087                                         | 0.121                                      |
| 24     | 653.44                                 | 673.92                  | 680.86                  | 0.127                                         | <b>0.031</b>                                  | 42.26                             | 43.28                   | 43.32                      | 0.209                                         | 0.218                                      |
| 25     | 763.80                                 | 780.08                  | 791.15                  | 0.312                                         | 0.070                                         | 44.93                             | 45.61                   | 45.77                      | 0.443                                         | 0.363                                      |
| 26     | 887.04                                 | 897.21                  | 913.79                  | 0.596                                         | 0.135                                         | 47.49                             | 47.79                   | 48.1                       | 0.752                                         | 0.539                                      |
| 27     | 1023.79                                | 1026.55                 | 1050.10                 | 0.902                                         | 0.208                                         | 49.93                             | 49.88                   | 50.31                      | 0.960                                         | 0.714                                      |
| 28     | 1174.68                                | 1169.79                 | 1201.78                 | 0.847                                         | 0.257                                         | 52.25                             | 51.92                   | 52.45                      | 0.757                                         | 0.856                                      |
| 29     | 1340.05                                | 1328.58                 | 1370.81                 | 0.683                                         | 0.252                                         | 54.45                             | 53.97                   | 54.54                      | 0.657                                         | 0.942                                      |
| 30     | 1519.34                                | 1503.5                  | 1556.93                 | 0.615                                         | 0.216                                         | 56.55                             | 56.05                   | 56.58                      | 0.648                                         | 0.981                                      |
| 31     | 1711.13                                | 1694.69                 | 1757.36                 | 0.651                                         | 0.188                                         | 58.56                             | 58.13                   | 58.57                      | 0.714                                         | 0.997                                      |
| 32     | 1913.27                                | 1901.89                 | 1967.45                 | 0.788                                         | 0.184                                         | 60.50                             | 60.22                   | 60.48                      | 0.827                                         | 0.985                                      |
| 33     | 2122.78                                | 2124.33                 | 2180.45                 | 0.974                                         | 0.215                                         | 62.39                             | 62.31                   | 62.28                      | 0.955                                         | 0.942                                      |
| 34     | 2335.80                                | 2360.66                 | 2387.49                 | 0.639                                         | 0.311                                         | 64.26                             | 64.39                   | 63.97                      | 0.923                                         | 0.852                                      |
| 35     | 2548.11                                | 2607.75                 | 2579.39                 | 0.304                                         | 0.572                                         | 66.11                             | 66.45                   | 65.53                      | 0.814                                         | 0.714                                      |
| 36     | 2756.66                                | 2856.28                 | 2763.50                 | 0.135                                         | 0.913                                         | 67.83                             | 68.41                   | 67.01                      | 0.712                                         | 0.626                                      |
| 37     | 2958.92                                | 3092.69                 | 2961.71                 | 0.082                                         | 0.969                                         | 69.24                             | 70.15                   | 68.51                      | 0.598                                         | 0.689                                      |
| 38     | 3152.56                                | 3300.40                 | 3203.03                 | 0.073                                         | 0.513                                         | 70.12                             | 71.52                   | 70.16                      | 0.436                                         | 0.984                                      |
| 39     | 3335.59                                | 3460.86                 | 3526.18                 | 0.164                                         | <b>0.044</b>                                  | 70.28                             | 72.38                   | 72.06                      | 0.264                                         | 0.376                                      |
| 40     | 3506.38                                | 3555.38                 | 3986.26                 | 0.720                                         | <b>0.005</b>                                  | 69.56                             | 72.60                   | 74.37                      | 0.258                                         | 0.055                                      |

**Supplementary Table S9B. Back-transformed and pairwise comparison of weekly fetal growth biometrics across sum of odd-chain saturated fatty acids tertiles in the NICHD Fetal Growth Studies-Singletons**

| G<br>W | Head circumference, mm            |                         |                         |                                            |                                            | Biparietal diameter, mm           |                         |                         |                                            |                                            |
|--------|-----------------------------------|-------------------------|-------------------------|--------------------------------------------|--------------------------------------------|-----------------------------------|-------------------------|-------------------------|--------------------------------------------|--------------------------------------------|
|        | <u>Back-transformed geometric</u> |                         |                         | <u>Wald test for pairwise</u>              |                                            | <u>Back-transformed geometric</u> |                         |                         | <u>Wald test for pairwise</u>              |                                            |
|        | <u>mean</u>                       |                         |                         | <u>comparison</u>                          |                                            | <u>mean mm</u>                    |                         |                         | <u>comparison</u>                          |                                            |
|        | 1 <sup>st</sup> tertile           | 2 <sup>nd</sup> tertile | 3 <sup>rd</sup> tertile | 2 <sup>nd</sup> vs 1 <sup>st</sup> tertile | 3 <sup>rd</sup> vs 1 <sup>st</sup> tertile | 1 <sup>st</sup> tertile           | 2 <sup>nd</sup> tertile | 3 <sup>rd</sup> tertile | 2 <sup>nd</sup> vs 1 <sup>st</sup> tertile | 3 <sup>rd</sup> vs 1 <sup>st</sup> tertile |
| 10     | 50.81                             | 47.07                   | 51.48                   | <b>0.042</b>                               | 0.695                                      | 12.14                             | 11.71                   | 12.87                   | 0.410                                      | 0.178759                                   |
| 11     | 61.85                             | 58.83                   | 62.33                   | <b>0.013</b>                               | 0.661                                      | 15.66                             | 15.22                   | 16.10                   | 0.223                                      | 0.217932                                   |
| 12     | 73.67                             | 71.52                   | 74.00                   | <b>0.005</b>                               | 0.611                                      | 19.39                             | 19.03                   | 19.57                   | 0.094                                      | 0.378239                                   |
| 13     | 86.01                             | 84.79                   | 86.28                   | 0.099                                      | 0.675                                      | 23.18                             | 22.97                   | 23.19                   | 0.333                                      | 0.937566                                   |
| 14     | 98.65                             | 98.32                   | 98.96                   | 0.730                                      | 0.716                                      | 26.88                             | 26.91                   | 26.86                   | 0.933                                      | 0.941149                                   |
| 15     | 111.38                            | 111.83                  | 111.84                  | 0.688                                      | 0.639                                      | 30.42                             | 30.72                   | 30.50                   | 0.365                                      | 0.787813                                   |
| 16     | 124.03                            | 125.12                  | 124.76                  | 0.364                                      | 0.483                                      | 33.74                             | 34.35                   | 34.06                   | 0.088                                      | 0.348725                                   |
| 17     | 136.52                            | 138.1                   | 137.59                  | 0.215                                      | 0.315                                      | 36.90                             | 37.77                   | 37.49                   | <b>0.018</b>                               | 0.079                                      |
| 18     | 148.81                            | 150.77                  | 150.28                  | 0.162                                      | 0.206                                      | 39.98                             | 41.05                   | 40.83                   | <b>0.009</b>                               | <b>0.022</b>                               |
| 19     | 160.89                            | 163.28                  | 162.82                  | 0.121                                      | 0.130                                      | 43.06                             | 44.28                   | 44.09                   | <b>0.07</b>                                | <b>0.011</b>                               |
| 20     | 172.67                            | 175.60                  | 175.18                  | 0.072                                      | 0.067                                      | 46.11                             | 47.48                   | 47.30                   | <b>0.004</b>                               | <b>0.006</b>                               |
| 21     | 184.11                            | 187.67                  | 187.27                  | <b>0.033</b>                               | <b>0.026</b>                               | 49.12                             | 50.63                   | 50.45                   | <b>0.002</b>                               | <b>0.003</b>                               |
| 22     | 195.17                            | 199.40                  | 199.04                  | <b>0.012</b>                               | <b>0.008</b>                               | 52.09                             | 53.73                   | 53.52                   | <b>0.001</b>                               | <b>0.001</b>                               |
| 23     | 205.86                            | 210.75                  | 210.43                  | <b>0.005</b>                               | <b>0.002</b>                               | 55.00                             | 56.76                   | 56.51                   | <b>&lt;0.001</b>                           | <b>&lt;0.001</b>                           |
| 24     | 216.24                            | 221.70                  | 221.45                  | <b>0.003</b>                               | <b>0.001</b>                               | 57.84                             | 59.71                   | 59.41                   | <b>&lt;0.001</b>                           | <b>0.001</b>                               |
| 25     | 226.37                            | 232.24                  | 232.08                  | <b>0.003</b>                               | <b>0.001</b>                               | 60.62                             | 62.57                   | 62.24                   | <b>&lt;0.001</b>                           | <b>0.002</b>                               |
| 26     | 236.37                            | 242.39                  | 242.38                  | <b>0.006</b>                               | <b>0.001</b>                               | 63.34                             | 65.35                   | 65.01                   | <b>0.001</b>                               | <b>0.003</b>                               |
| 27     | 246.37                            | 252.20                  | 252.39                  | <b>0.011</b>                               | <b>0.002</b>                               | 66.01                             | 68.05                   | 67.75                   | <b>0.002</b>                               | <b>0.004</b>                               |
| 28     | 256.53                            | 261.72                  | 262.19                  | <b>0.023</b>                               | <b>0.003</b>                               | 68.64                             | 70.68                   | 70.47                   | <b>0.002</b>                               | <b>0.002</b>                               |
| 29     | 266.91                            | 271.02                  | 271.88                  | 0.063                                      | <b>0.008</b>                               | 71.24                             | 73.25                   | 73.20                   | <b>&lt;0.001</b>                           | <b>&lt;0.001</b>                           |
| 30     | 277.23                            | 280.04                  | 281.37                  | 0.200                                      | <b>0.027</b>                               | 73.77                             | 75.76                   | 75.93                   | <b>&lt;0.001</b>                           | <b>&lt;0.0001</b>                          |
| 31     | 287.14                            | 288.70                  | 290.41                  | 0.504                                      | 0.102                                      | 76.22                             | 78.18                   | 78.58                   | <b>0.002</b>                               | <b>&lt;0.0001</b>                          |
| 32     | 296.23                            | 296.93                  | 298.71                  | 0.786                                      | 0.260                                      | 78.55                             | 80.53                   | 81.06                   | <b>0.006</b>                               | <b>&lt;0.001</b>                           |
| 33     | 304.08                            | 304.65                  | 305.96                  | 0.833                                      | 0.419                                      | 80.73                             | 82.79                   | 83.26                   | <b>0.007</b>                               | <b>&lt;0.001</b>                           |
| 34     | 310.23                            | 311.79                  | 311.86                  | 0.556                                      | 0.477                                      | 82.72                             | 84.95                   | 85.10                   | <b>0.003</b>                               | <b>&lt;0.001</b>                           |
| 35     | 314.46                            | 318.26                  | 316.14                  | 0.143                                      | 0.452                                      | 84.48                             | 87.00                   | 86.48                   | <b>0.001</b>                               | <b>&lt;0.001</b>                           |
| 36     | 317.33                            | 323.94                  | 319.28                  | <b>0.022</b>                               | 0.428                                      | 85.91                             | 88.91                   | 87.54                   | <b>&lt;0.001</b>                           | <b>0.037</b>                               |
| 37     | 319.57                            | 328.73                  | 322.17                  | <b>0.005</b>                               | 0.343                                      | 86.91                             | 90.6                    | 88.57                   | <b>&lt;0.001</b>                           | 0.067                                      |
| 38     | 321.96                            | 332.50                  | 325.79                  | <b>0.001</b>                               | 0.164                                      | 87.37                             | 92.03                   | 89.85                   | <b>&lt;0.0001</b>                          | <b>0.006</b>                               |
| 39     | 325.27                            | 335.14                  | 331.11                  | <b>0.004</b>                               | 0.073                                      | 87.20                             | 93.13                   | 91.69                   | <b>&lt;0.0001</b>                          | <b>&lt;0.0001</b>                          |
| 40     | 330.34                            | 336.56                  | 339.23                  | 0.314                                      | 0.170                                      | 86.31                             | 93.84                   | 94.45                   | <b>&lt;0.0001</b>                          | <b>&lt;0.001</b>                           |

Supplementary Table S10A. Back-transformed and pairwise comparison of weekly fetal growth biometrics across lignoceric acid (24:0) tertiles in the NICHD Fetal Growth Studies-Singletons

| G<br>W | Estimated fetal weight (EFW), g   |                         |                               |                                            |                                            | Abdominal circumference (AC), mm  |                         |                               |                                            |                                            | Femur length (FL), mm             |                         |                               |                                            |                                            |
|--------|-----------------------------------|-------------------------|-------------------------------|--------------------------------------------|--------------------------------------------|-----------------------------------|-------------------------|-------------------------------|--------------------------------------------|--------------------------------------------|-----------------------------------|-------------------------|-------------------------------|--------------------------------------------|--------------------------------------------|
|        | <u>Back-transformed geometric</u> |                         | <u>Wald test for pairwise</u> |                                            |                                            | <u>Back-transformed geometric</u> |                         | <u>Wald test for pairwise</u> |                                            |                                            | <u>Back-transformed geometric</u> |                         | <u>Wald test for pairwise</u> |                                            |                                            |
|        | <u>mean</u>                       |                         | <u>comparison</u>             |                                            |                                            | <u>mean mm</u>                    |                         | <u>comparison</u>             |                                            |                                            | <u>mean</u>                       |                         | <u>comparison</u>             |                                            |                                            |
|        | gram                              | gram                    | p value                       |                                            |                                            | mm                                | mm                      | p value                       |                                            |                                            | mm                                | mm                      | p value                       |                                            |                                            |
|        | 1 <sup>st</sup> tertile           | 2 <sup>nd</sup> tertile | 3 <sup>rd</sup> tertile       | 2 <sup>nd</sup> vs 1 <sup>st</sup> tertile | 3 <sup>rd</sup> vs 1 <sup>st</sup> tertile | 1 <sup>st</sup> tertile           | 2 <sup>nd</sup> tertile | 3 <sup>rd</sup> tertile       | 2 <sup>nd</sup> vs 1 <sup>st</sup> tertile | 3 <sup>rd</sup> vs 1 <sup>st</sup> tertile | 1 <sup>st</sup> tertile           | 2 <sup>nd</sup> tertile | 3 <sup>rd</sup> tertile       | 2 <sup>nd</sup> vs 1 <sup>st</sup> tertile | 3 <sup>rd</sup> vs 1 <sup>st</sup> tertile |
| 10     | 37.47                             | 35.31                   | 37.65                         | 0.246                                      | 0.945                                      | 41.76                             | 35.89                   | 40.33                         | <0.001                                     | 0.494                                      | 2.81                              | 2.06                    | 2.85                          | <0.0001                                    | 0.859                                      |
| 11     | 45.81                             | 43.84                   | 45.92                         | 0.122                                      | 0.945                                      | 49.72                             | 45.85                   | 48.28                         | <0.001                                     | 0.263                                      | 4.49                              | 3.82                    | 4.56                          | <0.0001                                    | 0.710                                      |
| 12     | 56.75                             | 55.10                   | 56.85                         | 0.061                                      | 0.919                                      | 58.61                             | 56.81                   | 57.24                         | 0.013                                      | 0.056                                      | 6.71                              | 6.31                    | 6.80                          | <0.001                                     | 0.464                                      |
| 13     | 70.98                             | 69.84                   | 71.16                         | 0.225                                      | 0.879                                      | 68.42                             | 68.46                   | 67.21                         | 0.961                                      | 0.089                                      | 9.40                              | 9.44                    | 9.51                          | 0.764                                      | 0.471                                      |
| 14     | 89.32                             | 88.92                   | 89.68                         | 0.767                                      | 0.832                                      | 79.07                             | 80.50                   | 78.12                         | 0.145                                      | 0.333                                      | 12.45                             | 12.98                   | 12.55                         | 0.025                                      | 0.673                                      |
| 15     | 112.67                            | 113.29                  | 113.37                        | 0.729                                      | 0.756                                      | 90.46                             | 92.65                   | 89.85                         | 0.060                                      | 0.594                                      | 15.73                             | 16.62                   | 15.80                         | 0.004                                      | 0.830                                      |
| 16     | 141.98                            | 143.91                  | 143.19                        | 0.391                                      | 0.654                                      | 102.44                            | 104.7                   | 102.21                        | 0.074                                      | 0.847                                      | 19.08                             | 20.11                   | 19.10                         | 0.004                                      | 0.968                                      |
| 17     | 178.08                            | 181.53                  | 179.98                        | 0.211                                      | 0.557                                      | 114.81                            | 116.52                  | 114.95                        | 0.200                                      | 0.910                                      | 22.40                             | 23.33                   | 22.36                         | 0.019                                      | 0.913                                      |
| 18     | 221.54                            | 226.55                  | 224.27                        | 0.148                                      | 0.503                                      | 127.33                            | 128.13                  | 127.78                        | 0.583                                      | 0.750                                      | 25.65                             | 26.31                   | 25.58                         | 0.134                                      | 0.861                                      |
| 19     | 272.50                            | 278.81                  | 276.22                        | 0.150                                      | 0.472                                      | 139.76                            | 139.6                   | 140.41                        | 0.918                                      | 0.678                                      | 28.85                             | 29.23                   | 28.76                         | 0.447                                      | 0.847                                      |
| 20     | 331.36                            | 338.39                  | 336.30                        | 0.198                                      | 0.437                                      | 151.96                            | 150.91                  | 152.71                        | 0.548                                      | 0.657                                      | 31.97                             | 32.11                   | 31.84                         | 0.801                                      | 0.812                                      |
| 21     | 398.71                            | 405.60                  | 405.03                        | 0.302                                      | 0.404                                      | 163.85                            | 162.00                  | 164.57                        | 0.325                                      | 0.683                                      | 34.97                             | 34.93                   | 34.80                         | 0.940                                      | 0.757                                      |
| 22     | 475.18                            | 480.79                  | 482.92                        | 0.486                                      | 0.384                                      | 175.40                            | 172.86                  | 175.93                        | 0.202                                      | 0.767                                      | 37.82                             | 37.66                   | 37.58                         | 0.795                                      | 0.690                                      |
| 23     | 561.43                            | 564.39                  | 570.41                        | 0.760                                      | 0.392                                      | 186.61                            | 183.47                  | 186.79                        | 0.138                                      | 0.923                                      | 40.49                             | 40.28                   | 40.19                         | 0.742                                      | 0.627                                      |
| 24     | 658.23                            | 657.01                  | 667.96                        | 0.917                                      | 0.439                                      | 197.54                            | 193.88                  | 197.19                        | 0.106                                      | 0.858                                      | 42.99                             | 42.78                   | 42.63                         | 0.760                                      | 0.584                                      |
| 25     | 766.52                            | 759.51                  | 776.04                        | 0.619                                      | 0.532                                      | 208.29                            | 204.16                  | 207.23                        | 0.090                                      | 0.620                                      | 45.33                             | 45.17                   | 44.93                         | 0.821                                      | 0.571                                      |
| 26     | 887.43                            | 873.11                  | 895.16                        | 0.397                                      | 0.673                                      | 219.00                            | 214.41                  | 217.06                        | 0.079                                      | 0.403                                      | 47.55                             | 47.45                   | 47.12                         | 0.895                                      | 0.579                                      |
| 27     | 1022.41                           | 999.48                  | 1025.94                       | 0.253                                      | 0.870                                      | 229.88                            | 224.75                  | 226.85                        | 0.067                                      | 0.218                                      | 49.70                             | 49.65                   | 49.27                         | 0.952                                      | 0.604                                      |
| 28     | 1173.27                           | 1140.89                 | 1169.13                       | 0.168                                      | 0.866                                      | 241.15                            | 235.37                  | 236.85                        | 0.049                                      | 0.081                                      | 51.83                             | 51.79                   | 51.45                         | 0.965                                      | 0.644                                      |
| 29     | 1341.96                           | 1299.72                 | 1325.47                       | 0.120                                      | 0.546                                      | 253.04                            | 246.40                  | 247.25                        | 0.029                                      | 0.014                                      | 54.01                             | 53.92                   | 53.71                         | 0.909                                      | 0.703                                      |
| 30     | 1528.28                           | 1475.76                 | 1494.93                       | 0.096                                      | 0.280                                      | 265.45                            | 257.76                  | 257.99                        | 0.016                                      | 0.001                                      | 56.25                             | 56.02                   | 56.03                         | 0.787                                      | 0.773                                      |
| 31     | 1730.03                           | 1666.98                 | 1676.94                       | 0.088                                      | 0.141                                      | 278.09                            | 269.29                  | 268.9                         | 0.010                                      | <0.001                                     | 58.50                             | 58.07                   | 58.32                         | 0.637                                      | 0.834                                      |
| 32     | 1943.40                           | 1869.74                 | 1870.54                       | 0.088                                      | 0.089                                      | 290.62                            | 280.79                  | 279.81                        | 0.007                                      | <0.001                                     | 60.70                             | 60.04                   | 60.51                         | 0.498                                      | 0.844                                      |
| 33     | 2162.70                           | 2078.55                 | 2074.31                       | 0.090                                      | 0.073                                      | 302.65                            | 292.07                  | 290.51                        | 0.007                                      | 0.0001                                     | 62.79                             | 61.88                   | 62.50                         | 0.380                                      | 0.777                                      |
| 34     | 2380.24                           | 2285.90                 | 2286.35                       | 0.091                                      | 0.084                                      | 313.72                            | 302.85                  | 300.74                        | 0.008                                      | <0.0001                                    | 64.70                             | 63.57                   | 64.18                         | 0.277                                      | 0.606                                      |
| 35     | 2587.39                           | 2485.65                 | 2503.97                       | 0.101                                      | 0.159                                      | 323.40                            | 312.97                  | 310.31                        | 0.014                                      | <0.0001                                    | 66.37                             | 65.07                   | 65.49                         | 0.210                                      | 0.358                                      |
| 36     | 2784.15                           | 2685.22                 | 2722.53                       | 0.159                                      | 0.363                                      | 331.92                            | 322.81                  | 319.38                        | 0.045                                      | <0.001                                     | 67.85                             | 66.53                   | 66.59                         | 0.234                                      | 0.238                                      |
| 37     | 2978.31                           | 2899.55                 | 2936.06                       | 0.318                                      | 0.591                                      | 340.17                            | 333.04                  | 328.28                        | 0.145                                      | 0.003                                      | 69.29                             | 68.13                   | 67.73                         | 0.340                                      | 0.217                                      |
| 38     | 3181.02                           | 3148.79                 | 3137.60                       | 0.708                                      | 0.613                                      | 349.19                            | 344.41                  | 337.35                        | 0.349                                      | 0.005                                      | 70.87                             | 70.10                   | 69.18                         | 0.533                                      | 0.201                                      |
| 39     | 3406.85                           | 3459.97                 | 3319.40                       | 0.595                                      | 0.355                                      | 360.09                            | 357.79                  | 347.01                        | 0.689                                      | 0.005                                      | 72.78                             | 72.69                   | 71.25                         | 0.952                                      | 0.291                                      |
| 40     | 3674.53                           | 3870.51                 | 3473.30                       | 0.198                                      | 0.161                                      | 374.16                            | 374.18                  | 357.71                        | 0.998                                      | 0.068                                      | 75.22                             | 76.19                   | 74.27                         | 0.730                                      | 0.738                                      |



Supplementary Table S10B. Back-transformed and pairwise comparison of weekly fetal growth biometrics across lignoceric acid (24:0) tertiles in the NICHD Fetal Growth Studies-Singletons

| G<br>W | Head circumference (HC), mm            |                         |                         |                                            |                                            | Biparietal diameter (BPD), mm          |                         |                         |                                            |                                            | HC/AC ratio                            |                         |                         |                                            |                                            |
|--------|----------------------------------------|-------------------------|-------------------------|--------------------------------------------|--------------------------------------------|----------------------------------------|-------------------------|-------------------------|--------------------------------------------|--------------------------------------------|----------------------------------------|-------------------------|-------------------------|--------------------------------------------|--------------------------------------------|
|        | <u>Back-transformed geometric mean</u> |                         |                         | <u>Wald test for pairwise comparison</u>   |                                            | <u>Back-transformed geometric mean</u> |                         |                         | <u>Wald test for pairwise comparison</u>   |                                            | <u>Back-transformed geometric mean</u> |                         |                         | <u>Wald test for pairwise comparison</u>   |                                            |
|        | mm                                     |                         |                         | p value                                    |                                            | mm                                     |                         |                         | p value                                    |                                            | mean                                   |                         |                         | p value                                    |                                            |
|        | 1 <sup>st</sup> tertile                | 2 <sup>nd</sup> tertile | 3 <sup>rd</sup> tertile | 2 <sup>nd</sup> vs 1 <sup>st</sup> tertile | 3 <sup>rd</sup> vs 1 <sup>st</sup> tertile | 1 <sup>st</sup> tertile                | 2 <sup>nd</sup> tertile | 3 <sup>rd</sup> tertile | 2 <sup>nd</sup> vs 1 <sup>st</sup> tertile | 3 <sup>rd</sup> vs 1 <sup>st</sup> tertile | 1 <sup>st</sup> tertile                | 2 <sup>nd</sup> tertile | 3 <sup>rd</sup> tertile | 2 <sup>nd</sup> vs 1 <sup>st</sup> tertile | 3 <sup>rd</sup> vs 1 <sup>st</sup> tertile |
| 10     | 48.84                                  | 46.33                   | 51.18                   | <b>0.043</b>                               | 0.186                                      | 13.25                                  | 11.63                   | 12.62                   | <b>0.002</b>                               | 0.278                                      | 1.27                                   | 1.26                    | 1.28                    | 0.899                                      | 0.671                                      |
| 11     | 60.23                                  | 58.34                   | 61.69                   | <b>0.044</b>                               | 0.225                                      | 16.28                                  | 15.30                   | 15.82                   | <b>0.005</b>                               | 0.213                                      | 1.26                                   | 1.25                    | 1.29                    | 0.737                                      | 0.312                                      |
| 12     | 72.46                                  | 71.25                   | 72.97                   | 0.113                                      | 0.554                                      | 19.56                                  | 19.26                   | 19.25                   | 0.143                                      | 0.143                                      | 1.26                                   | 1.25                    | 1.28                    | 0.402                                      | <b>0.035</b>                               |
| 13     | 85.24                                  | 84.68                   | 84.85                   | 0.491                                      | 0.682                                      | 23.02                                  | 23.31                   | 22.80                   | 0.115                                      | 0.318                                      | 1.24                                   | 1.23                    | 1.26                    | 0.208                                      | <b>0.038</b>                               |
| 14     | 98.30                                  | 98.25                   | 97.15                   | 0.964                                      | 0.325                                      | 26.59                                  | 27.27                   | 26.40                   | <b>0.006</b>                               | 0.522                                      | 1.23                                   | 1.22                    | 1.24                    | 0.269                                      | 0.274                                      |
| 15     | 111.40                                 | 111.66                  | 109.68                  | 0.821                                      | 0.197                                      | 30.20                                  | 31.01                   | 29.95                   | <b>0.006</b>                               | 0.471                                      | 1.22                                   | 1.21                    | 1.22                    | 0.303                                      | 0.768                                      |
| 16     | 124.39                                 | 124.70                  | 122.29                  | 0.806                                      | 0.146                                      | 33.81                                  | 34.49                   | 33.42                   | <b>0.029</b>                               | 0.277                                      | 1.20                                   | 1.19                    | 1.20                    | 0.295                                      | 0.571                                      |
| 17     | 137.19                                 | 137.3                   | 134.89                  | 0.934                                      | 0.139                                      | 37.38                                  | 37.71                   | 36.78                   | 0.295                                      | 0.109                                      | 1.19                                   | 1.18                    | 1.17                    | 0.289                                      | 0.124                                      |
| 18     | 149.81                                 | 149.53                  | 147.42                  | 0.849                                      | 0.161                                      | 40.89                                  | 40.75                   | 40.07                   | 0.686                                      | <b>0.044</b>                               | 1.18                                   | 1.17                    | 1.15                    | 0.321                                      | <b>0.020</b>                               |
| 19     | 162.36                                 | 161.57                  | 159.83                  | 0.627                                      | 0.180                                      | 44.34                                  | 43.77                   | 43.31                   | 0.114                                      | <b>0.021</b>                               | 1.16                                   | 1.16                    | 1.14                    | 0.376                                      | <b>0.005</b>                               |
| 20     | 174.76                                 | 173.42                  | 172.04                  | 0.442                                      | 0.179                                      | 47.72                                  | 46.77                   | 46.48                   | <b>0.014</b>                               | <b>0.010</b>                               | 1.16                                   | 1.15                    | 1.13                    | 0.434                                      | <b>0.002</b>                               |
| 21     | 186.94                                 | 184.99                  | 183.95                  | 0.300                                      | 0.162                                      | 51.01                                  | 49.76                   | 49.58                   | <b>0.002</b>                               | <b>0.004</b>                               | 1.15                                   | 1.14                    | 1.12                    | 0.499                                      | <b>&lt;0.001</b>                           |
| 22     | 198.81                                 | 196.25                  | 195.51                  | 0.200                                      | 0.141                                      | 54.18                                  | 52.72                   | 52.58                   | <b>&lt;0.001</b>                           | <b>0.001</b>                               | 1.14                                   | 1.14                    | 1.11                    | 0.589                                      | <b>&lt;0.001</b>                           |
| 23     | 210.34                                 | 207.15                  | 206.68                  | 0.136                                      | 0.122                                      | 57.24                                  | 55.63                   | 55.48                   | <b>&lt;0.0001</b>                          | <b>0.001</b>                               | 1.13                                   | 1.13                    | 1.11                    | 0.727                                      | <b>&lt;0.001</b>                           |
| 24     | 221.47                                 | 217.70                  | 217.45                  | 0.098                                      | 0.111                                      | 60.18                                  | 58.49                   | 58.29                   | <b>&lt;0.0001</b>                          | <b>&lt;0.001</b>                           | 1.13                                   | 1.13                    | 1.10                    | 0.917                                      | <b>0.003</b>                               |
| 25     | 232.22                                 | 227.90                  | 227.84                  | 0.078                                      | 0.108                                      | 63.04                                  | 61.3                    | 61.02                   | <b>&lt;0.001</b>                           | <b>&lt;0.001</b>                           | 1.12                                   | 1.12                    | 1.10                    | 0.865                                      | <b>0.018</b>                               |
| 26     | 242.57                                 | 237.80                  | 237.90                  | 0.068                                      | 0.109                                      | 65.81                                  | 64.06                   | 63.68                   | <b>&lt;0.001</b>                           | <b>&lt;0.001</b>                           | 1.11                                   | 1.12                    | 1.10                    | 0.646                                      | 0.087                                      |
| 27     | 252.58                                 | 247.46                  | 247.69                  | 0.065                                      | 0.113                                      | 68.54                                  | 66.75                   | 66.30                   | <b>&lt;0.001</b>                           | <b>&lt;0.001</b>                           | 1.10                                   | 1.11                    | 1.09                    | 0.430                                      | 0.286                                      |
| 28     | 262.28                                 | 256.96                  | 257.31                  | 0.068                                      | 0.118                                      | 71.27                                  | 69.4                    | 68.91                   | <b>&lt;0.001</b>                           | <b>&lt;0.001</b>                           | 1.09                                   | 1.10                    | 1.09                    | 0.223                                      | 0.683                                      |
| 29     | 271.74                                 | 266.35                  | 266.83                  | 0.077                                      | 0.130                                      | 74.02                                  | 72.01                   | 71.53                   | <b>&lt;0.0001</b>                          | <b>&lt;0.0001</b>                          | 1.08                                   | 1.09                    | 1.08                    | 0.071                                      | 0.727                                      |
| 30     | 280.85                                 | 275.52                  | 276.13                  | 0.096                                      | 0.158                                      | 76.76                                  | 74.54                   | 74.13                   | <b>&lt;0.0001</b>                          | <b>&lt;0.0001</b>                          | 1.06                                   | 1.08                    | 1.07                    | <b>0.017</b>                               | 0.237                                      |
| 31     | 289.47                                 | 284.29                  | 285.02                  | 0.125                                      | 0.209                                      | 79.43                                  | 76.97                   | 76.65                   | <b>&lt;0.0001</b>                          | <b>&lt;0.0001</b>                          | 1.05                                   | 1.06                    | 1.06                    | <b>0.008</b>                               | 0.069                                      |
| 32     | 297.47                                 | 292.47                  | 293.32                  | 0.162                                      | 0.275                                      | 81.96                                  | 79.28                   | 79.04                   | <b>&lt;0.0001</b>                          | <b>&lt;0.0001</b>                          | 1.03                                   | 1.05                    | 1.05                    | <b>0.009</b>                               | <b>0.033</b>                               |
| 33     | 304.69                                 | 299.85                  | 300.81                  | 0.198                                      | 0.334                                      | 84.29                                  | 81.43                   | 81.22                   | <b>&lt;0.0001</b>                          | <b>&lt;0.0001</b>                          | 1.02                                   | 1.03                    | 1.03                    | <b>0.013</b>                               | <b>0.022</b>                               |
| 34     | 310.97                                 | 306.23                  | 307.28                  | 0.223                                      | 0.368                                      | 86.33                                  | 83.39                   | 83.13                   | <b>&lt;0.0001</b>                          | <b>&lt;0.0001</b>                          | 1.00                                   | 1.02                    | 1.02                    | <b>0.023</b>                               | <b>0.018</b>                               |
| 35     | 316.18                                 | 311.48                  | 312.55                  | 0.245                                      | 0.382                                      | 88.00                                  | 85.13                   | 84.71                   | <b>&lt;0.0001</b>                          | <b>&lt;0.0001</b>                          | 0.99                                   | 1.00                    | 1.01                    | 0.103                                      | <b>0.029</b>                               |
| 36     | 320.43                                 | 315.93                  | 316.59                  | 0.293                                      | 0.384                                      | 89.34                                  | 86.70                   | 85.93                   | <b>&lt;0.001</b>                           | <b>&lt;0.0001</b>                          | 0.98                                   | 0.98                    | 0.99                    | 0.542                                      | 0.178                                      |
| 37     | 324.02                                 | 320.05                  | 319.41                  | 0.377                                      | 0.333                                      | 90.46                                  | 88.12                   | 86.77                   | <b>0.005</b>                               | <b>&lt;0.001</b>                           | 0.97                                   | 0.97                    | 0.97                    | 0.879                                      | 0.682                                      |
| 38     | 327.30                                 | 324.32                  | 321.06                  | 0.515                                      | 0.202                                      | 91.47                                  | 89.44                   | 87.25                   | <b>0.011</b>                               | <b>&lt;0.0001</b>                          | 0.95                                   | 0.95                    | 0.95                    | 0.490                                      | 0.645                                      |
| 39     | 330.63                                 | 329.25                  | 321.60                  | 0.778                                      | 0.071                                      | 92.51                                  | 90.73                   | 87.35                   | 0.067                                      | <b>&lt;0.0001</b>                          | 0.94                                   | 0.93                    | 0.93                    | 0.490                                      | 0.178                                      |
| 40     | 334.38                                 | 335.39                  | 321.09                  | 0.880                                      | <b>0.046</b>                               | 93.70                                  | 92.02                   | 87.08                   | 0.449                                      | <b>&lt;0.001</b>                           | 0.92                                   | 0.92                    | 0.90                    | 0.885                                      | 0.231                                      |

HC/AC ratio, head circumference/abdominal circumference ratio.

Supplementary Table S11. Back-transformed and pairwise comparison of weekly fetal growth biometrics across arachidic acid (20:0) tertiles in the NICHD Fetal Growth Studies-Singletons

| G<br>W | Femur length, mm                  |                         |                         |                                            |                                            | Head circumference, mm            |                         |                         |                                            |                                            | Biparietal diameter, mm           |                         |                         |                                            |                                            |
|--------|-----------------------------------|-------------------------|-------------------------|--------------------------------------------|--------------------------------------------|-----------------------------------|-------------------------|-------------------------|--------------------------------------------|--------------------------------------------|-----------------------------------|-------------------------|-------------------------|--------------------------------------------|--------------------------------------------|
|        | <u>Back-transformed geometric</u> |                         |                         | <u>Wald test for pairwise</u>              |                                            | <u>Back-transformed geometric</u> |                         |                         | <u>Wald test for pairwise</u>              |                                            | <u>Back-transformed geometric</u> |                         |                         | <u>Wald test for pairwise</u>              |                                            |
|        | <u>mean</u>                       |                         |                         | <u>comparison</u>                          |                                            | <u>mean</u>                       |                         |                         | <u>comparison</u>                          |                                            | <u>mean mm</u>                    |                         |                         | <u>comparison</u>                          |                                            |
|        | 1 <sup>st</sup> tertile           | 2 <sup>nd</sup> tertile | 3 <sup>rd</sup> tertile | 2 <sup>nd</sup> vs 1 <sup>st</sup> tertile | 3 <sup>rd</sup> vs 1 <sup>st</sup> tertile | 1 <sup>st</sup> tertile           | 2 <sup>nd</sup> tertile | 3 <sup>rd</sup> tertile | 2 <sup>nd</sup> vs 1 <sup>st</sup> tertile | 3 <sup>rd</sup> vs 1 <sup>st</sup> tertile | 1 <sup>st</sup> tertile           | 2 <sup>nd</sup> tertile | 3 <sup>rd</sup> tertile | 2 <sup>nd</sup> vs 1 <sup>st</sup> tertile | 3 <sup>rd</sup> vs 1 <sup>st</sup> tertile |
| 10     | 2.24                              | 2.65                    | 2.37                    | <b>0.006</b>                               | 0.336                                      | 52.07                             | 51.06                   | 46.51                   | 0.570                                      | <b>0.003</b>                               | 12.94                             | 13.19                   | 10.93                   | 0.612                                      | <b>&lt;0.0001</b>                          |
| 11     | 3.99                              | 4.48                    | 4.06                    | <b>0.001</b>                               | 0.668                                      | 62.47                             | 61.99                   | 58.75                   | 0.674                                      | <b>0.003</b>                               | 16.10                             | 16.38                   | 14.75                   | 0.403                                      | <b>0.0001</b>                              |
| 12     | 6.43                              | 6.90                    | 6.33                    | <b>&lt;0.0001</b>                          | 0.565                                      | 73.69                             | 73.7                    | 71.85                   | 0.986                                      | <b>0.010</b>                               | 19.49                             | 19.77                   | 18.88                   | 0.160                                      | <b>0.003</b>                               |
| 13     | 9.46                              | 9.83                    | 9.13                    | <b>0.014</b>                               | 0.138                                      | 85.56                             | 85.97                   | 85.39                   | 0.539                                      | 0.779                                      | 23.02                             | 23.29                   | 23.10                   | 0.170                                      | 0.650                                      |
| 14     | 12.88                             | 13.07                   | 12.29                   | 0.431                                      | 0.063                                      | 97.91                             | 98.57                   | 98.99                   | 0.455                                      | 0.183                                      | 26.60                             | 26.85                   | 27.21                   | 0.354                                      | <b>0.014</b>                               |
| 15     | 16.43                             | 16.40                   | 15.63                   | 0.943                                      | 0.056                                      | 110.56                            | 111.31                  | 112.34                  | 0.472                                      | 0.067                                      | 30.16                             | 30.37                   | 31.04                   | 0.507                                      | <b>0.003</b>                               |
| 16     | 19.86                             | 19.67                   | 18.97                   | 0.609                                      | 0.079                                      | 123.37                            | 124.05                  | 125.28                  | 0.536                                      | 0.062                                      | 33.66                             | 33.82                   | 34.55                   | 0.621                                      | <b>0.004</b>                               |
| 17     | 23.06                             | 22.77                   | 22.22                   | 0.518                                      | 0.161                                      | 136.21                            | 136.68                  | 137.79                  | 0.666                                      | 0.136                                      | 37.06                             | 37.18                   | 37.78                   | 0.722                                      | <b>0.027</b>                               |
| 18     | 26.03                             | 25.75                   | 25.41                   | 0.603                                      | 0.377                                      | 148.98                            | 149.21                  | 150.02                  | 0.844                                      | 0.373                                      | 40.39                             | 40.47                   | 40.84                   | 0.807                                      | 0.197                                      |
| 19     | 28.89                             | 28.70                   | 28.58                   | 0.765                                      | 0.706                                      | 161.63                            | 161.64                  | 162.15                  | 0.992                                      | 0.688                                      | 43.68                             | 43.74                   | 43.9                    | 0.862                                      | 0.565                                      |
| 20     | 31.74                             | 31.63                   | 31.71                   | 0.878                                      | 0.974                                      | 174.07                            | 173.9                   | 174.14                  | 0.904                                      | 0.962                                      | 46.93                             | 46.98                   | 46.96                   | 0.903                                      | 0.943                                      |
| 21     | 34.55                             | 34.49                   | 34.75                   | 0.943                                      | 0.857                                      | 186.22                            | 185.92                  | 185.9                   | 0.833                                      | 0.828                                      | 50.12                             | 50.16                   | 49.99                   | 0.934                                      | 0.766                                      |
| 22     | 37.29                             | 37.26                   | 37.64                   | 0.972                                      | 0.770                                      | 198.01                            | 197.6                   | 197.38                  | 0.784                                      | 0.673                                      | 53.25                             | 53.27                   | 52.99                   | 0.954                                      | 0.560                                      |
| 23     | 39.95                             | 39.91                   | 40.38                   | 0.976                                      | 0.744                                      | 209.4                             | 208.92                  | 208.53                  | 0.762                                      | 0.569                                      | 56.29                             | 56.31                   | 55.93                   | 0.964                                      | 0.426                                      |
| 24     | 42.50                             | 42.44                   | 42.96                   | 0.963                                      | 0.758                                      | 220.35                            | 219.84                  | 219.33                  | 0.761                                      | 0.516                                      | 59.25                             | 59.27                   | 58.81                   | 0.964                                      | 0.350                                      |
| 25     | 44.95                             | 44.84                   | 45.37                   | 0.939                                      | 0.799                                      | 230.89                            | 230.36                  | 229.76                  | 0.772                                      | 0.505                                      | 62.13                             | 62.16                   | 61.61                   | 0.954                                      | 0.309                                      |
| 26     | 47.30                             | 47.13                   | 47.64                   | 0.912                                      | 0.853                                      | 241.04                            | 240.49                  | 239.84                  | 0.783                                      | 0.515                                      | 64.93                             | 64.98                   | 64.32                   | 0.933                                      | 0.278                                      |
| 27     | 49.57                             | 49.32                   | 49.80                   | 0.883                                      | 0.908                                      | 250.86                            | 250.28                  | 249.61                  | 0.782                                      | 0.524                                      | 67.66                             | 67.74                   | 66.95                   | 0.900                                      | 0.230                                      |
| 28     | 51.78                             | 51.44                   | 51.91                   | 0.858                                      | 0.954                                      | 260.43                            | 259.79                  | 259.11                  | 0.759                                      | 0.513                                      | 70.35                             | 70.47                   | 69.49                   | 0.851                                      | 0.156                                      |
| 29     | 53.95                             | 53.53                   | 54.01                   | 0.838                                      | 0.981                                      | 269.82                            | 269.05                  | 268.43                  | 0.704                                      | 0.481                                      | 73.01                             | 73.18                   | 71.93                   | 0.790                                      | 0.074                                      |
| 30     | 56.08                             | 55.59                   | 56.13                   | 0.825                                      | 0.984                                      | 278.93                            | 278                     | 277.52                  | 0.644                                      | 0.473                                      | 75.61                             | 75.82                   | 74.29                   | 0.732                                      | <b>0.029</b>                               |
| 31     | 58.16                             | 57.61                   | 58.26                   | 0.824                                      | 0.969                                      | 287.59                            | 286.52                  | 286.25                  | 0.623                                      | 0.519                                      | 78.10                             | 78.37                   | 76.57                   | 0.687                                      | <b>0.017</b>                               |
| 32     | 60.16                             | 59.61                   | 60.37                   | 0.837                                      | 0.942                                      | 295.63                            | 294.52                  | 294.48                  | 0.647                                      | 0.613                                      | 80.43                             | 80.78                   | 78.78                   | 0.645                                      | <b>0.019</b>                               |
| 33     | 62.06                             | 61.57                   | 62.42                   | 0.864                                      | 0.909                                      | 302.86                            | 301.89                  | 302.02                  | 0.710                                      | 0.733                                      | 82.54                             | 82.99                   | 80.93                   | 0.584                                      | <b>0.032</b>                               |
| 34     | 63.86                             | 63.51                   | 64.40                   | 0.907                                      | 0.874                                      | 309.08                            | 308.53                  | 308.73                  | 0.831                                      | 0.886                                      | 84.39                             | 84.95                   | 83.03                   | 0.485                                      | 0.075                                      |
| 35     | 65.54                             | 65.42                   | 66.25                   | 0.969                                      | 0.842                                      | 314.21                            | 314.33                  | 314.41                  | 0.960                                      | 0.933                                      | 85.93                             | 86.63                   | 85.09                   | 0.376                                      | 0.278                                      |
| 36     | 67.08                             | 67.28                   | 67.94                   | 0.953                                      | 0.819                                      | 318.63                            | 319.33                  | 318.94                  | 0.801                                      | 0.912                                      | 87.25                             | 88.02                   | 86.98                   | 0.374                                      | 0.763                                      |
| 37     | 68.47                             | 69.07                   | 69.42                   | 0.870                                      | 0.814                                      | 322.93                            | 323.62                  | 322.2                   | 0.824                                      | 0.819                                      | 88.47                             | 89.14                   | 88.48                   | 0.490                                      | 0.986                                      |
| 38     | 69.70                             | 70.76                   | 70.62                   | 0.787                                      | 0.827                                      | 327.68                            | 327.32                  | 324.07                  | 0.909                                      | 0.253                                      | 89.72                             | 90.03                   | 89.36                   | 0.756                                      | 0.717                                      |
| 39     | 70.76                             | 72.30                   | 71.49                   | 0.713                                      | 0.869                                      | 333.54                            | 330.55                  | 324.46                  | 0.425                                      | <b>0.010</b>                               | 91.13                             | 90.72                   | 89.37                   | 0.722                                      | 0.107                                      |
| 40     | 71.64                             | 73.67                   | 71.98                   | 0.679                                      | 0.946                                      | 341.18                            | 333.45                  | 323.31                  | 0.276                                      | <b>0.011</b>                               | 92.86                             | 91.26                   | 88.32                   | 0.454                                      | 0.031                                      |

**Supplementary Table S12A. Back-transformed and pairwise comparison of weekly fetal growth biometrics across Behenic acid (22:0) tertiles in the NICHD Fetal Growth Studies-Singletons**

| G<br>W | Estimated fetal weight, g              |                         |                         |                                            |                                            | Abdominal circumference, mm       |                         |                         |                                            |                                            |
|--------|----------------------------------------|-------------------------|-------------------------|--------------------------------------------|--------------------------------------------|-----------------------------------|-------------------------|-------------------------|--------------------------------------------|--------------------------------------------|
|        | <u>Back-transformed geometric mean</u> |                         |                         | <u>Wald test for pairwise</u>              |                                            | <u>Back-transformed geometric</u> |                         |                         | <u>Wald test for pairwise</u>              |                                            |
|        | gram                                   |                         |                         | <u>comparison</u>                          |                                            | <u>mean mm</u>                    |                         |                         | <u>comparison</u>                          |                                            |
|        | 1 <sup>st</sup> tertile                | 2 <sup>nd</sup> tertile | 3 <sup>rd</sup> tertile | 2 <sup>nd</sup> vs 1 <sup>st</sup> p value | 3 <sup>rd</sup> vs 1 <sup>st</sup> p value | 1 <sup>st</sup> tertile           | 2 <sup>nd</sup> tertile | 3 <sup>rd</sup> tertile | 2 <sup>nd</sup> vs 1 <sup>st</sup> p value | 3 <sup>rd</sup> vs 1 <sup>st</sup> p value |
| 10     | 33.88                                  | 38.61                   | 37.12                   | 0.060                                      | 0.228                                      | 40.17                             | 42.07                   | 36.27                   | 0.286                                      | <b>0.033</b>                               |
| 11     | 43.44                                  | 45.34                   | 46.10                   | 0.253                                      | 0.155                                      | 48.88                             | 48.85                   | 46.47                   | 0.976                                      | <b>0.046</b>                               |
| 12     | 55.75                                  | 54.79                   | 57.74                   | 0.402                                      | 0.111                                      | 58.61                             | 56.74                   | 57.55                   | <b>0.004</b>                               | 0.132                                      |
| 13     | 71.49                                  | 67.69                   | 72.73                   | <b>0.004</b>                               | 0.314                                      | 69.26                             | 65.80                   | 69.16                   | <b>&lt;0.0001</b>                          | 0.869                                      |
| 14     | 91.43                                  | 84.98                   | 91.87                   | <b>0.001</b>                               | 0.800                                      | 80.73                             | 76.05                   | 80.98                   | <b>&lt;0.0001</b>                          | 0.769                                      |
| 15     | 116.40                                 | 107.75                  | 116.00                  | <b>&lt;0.001</b>                           | 0.860                                      | 92.86                             | 87.42                   | 92.75                   | <b>&lt;0.0001</b>                          | 0.920                                      |
| 16     | 147.26                                 | 137.10                  | 145.99                  | <b>&lt;0.001</b>                           | 0.649                                      | 105.45                            | 99.77                   | 104.32                  | <b>&lt;0.0001</b>                          | 0.300                                      |
| 17     | 184.76                                 | 173.99                  | 182.57                  | <b>0.002</b>                               | 0.520                                      | 118.3                             | 112.81                  | 115.67                  | <b>&lt;0.0001</b>                          | <b>0.021</b>                               |
| 18     | 229.49                                 | 218.86                  | 226.23                  | <b>0.015</b>                               | 0.445                                      | 131.18                            | 126.13                  | 126.93                  | <b>&lt;0.0001</b>                          | <b>0.001</b>                               |
| 19     | 281.80                                 | 271.39                  | 277.18                  | 0.058                                      | 0.389                                      | 143.87                            | 139.25                  | 138.24                  | <b>0.001</b>                               | <b>&lt;0.0001</b>                          |
| 20     | 342.18                                 | 331.56                  | 335.95                  | 0.113                                      | 0.338                                      | 156.22                            | 151.87                  | 149.54                  | <b>0.005</b>                               | <b>&lt;0.0001</b>                          |
| 21     | 411.21                                 | 399.63                  | 403.11                  | 0.143                                      | 0.290                                      | 168.14                            | 163.88                  | 160.77                  | <b>0.008</b>                               | <b>&lt;0.0001</b>                          |
| 22     | 489.45                                 | 475.82                  | 479.24                  | 0.138                                      | 0.251                                      | 179.59                            | 175.23                  | 171.90                  | <b>0.008</b>                               | <b>&lt;0.0001</b>                          |
| 23     | 577.46                                 | 560.38                  | 564.94                  | 0.109                                      | 0.225                                      | 190.56                            | 185.92                  | 182.90                  | <b>0.006</b>                               | <b>&lt;0.0001</b>                          |
| 24     | 675.84                                 | 653.66                  | 660.84                  | 0.078                                      | 0.217                                      | 201.11                            | 196.03                  | 193.77                  | <b>0.004</b>                               | <b>&lt;0.0001</b>                          |
| 25     | 785.27                                 | 756.16                  | 767.69                  | 0.053                                      | 0.225                                      | 211.34                            | 205.70                  | 204.53                  | <b>0.004</b>                               | <b>&lt;0.001</b>                           |
| 26     | 906.54                                 | 868.65                  | 886.35                  | <b>0.034</b>                               | 0.242                                      | 221.40                            | 215.14                  | 215.24                  | <b>0.003</b>                               | <b>0.003</b>                               |
| 27     | 1040.59                                | 992.22                  | 1017.87                 | <b>0.021</b>                               | 0.261                                      | 231.46                            | 224.59                  | 225.97                  | <b>0.002</b>                               | <b>0.012</b>                               |
| 28     | 1188.62                                | 1128.43                 | 1163.55                 | <b>0.011</b>                               | 0.276                                      | 241.78                            | 234.36                  | 236.80                  | <b>0.001</b>                               | <b>0.023</b>                               |
| 29     | 1351.68                                | 1279.21                 | 1324.85                 | <b>0.005</b>                               | 0.293                                      | 252.51                            | 244.77                  | 247.84                  | <b>&lt;0.001</b>                           | <b>0.026</b>                               |
| 30     | 1529.40                                | 1445.74                 | 1501.74                 | <b>0.004</b>                               | 0.331                                      | 263.57                            | 255.82                  | 259.05                  | <b>&lt;0.001</b>                           | <b>0.029</b>                               |
| 31     | 1720.47                                | 1628.65                 | 1692.48                 | <b>0.005</b>                               | 0.393                                      | 274.79                            | 267.39                  | 270.27                  | <b>0.001</b>                               | <b>0.043</b>                               |
| 32     | 1922.67                                | 1828.41                 | 1894.09                 | <b>0.016</b>                               | 0.456                                      | 285.98                            | 279.32                  | 281.32                  | <b>0.009</b>                               | 0.065                                      |
| 33     | 2132.82                                | 2045.22                 | 2102.21                 | 0.053                                      | 0.488                                      | 296.93                            | 291.42                  | 292.01                  | 0.051                                      | 0.073                                      |
| 34     | 2346.69                                | 2278.99                 | 2310.98                 | 0.175                                      | 0.464                                      | 307.38                            | 303.48                  | 302.11                  | 0.167478                                   | 0.055                                      |
| 35     | 2560.58                                | 2528.79                 | 2513.30                 | 0.553                                      | 0.375                                      | 317.21                            | 315.24                  | 311.39                  | 0.469981                                   | <b>0.035</b>                               |
| 36     | 2774.96                                | 2787.92                 | 2704.15                 | 0.831                                      | 0.251                                      | 326.77                            | 326.50                  | 319.80                  | 0.928129                                   | <b>0.034</b>                               |
| 37     | 2992.16                                | 3043.80                 | 2881.43                 | 0.466                                      | 0.122                                      | 336.60                            | 337.14                  | 327.45                  | 0.880475                                   | <b>0.018</b>                               |
| 38     | 3215.82                                | 3280.04                 | 3044.01                 | 0.413                                      | <b>0.024</b>                               | 347.30                            | 347.07                  | 334.47                  | 0.949557                                   | <b>&lt;0.001</b>                           |
| 39     | 3451.05                                | 3477.22                 | 3191.62                 | 0.766                                      | <b>0.002</b>                               | 359.55                            | 356.16                  | 341.04                  | 0.452523                                   | <b>&lt;0.0001</b>                          |
| 40     | 3704.55                                | 3614.42                 | 3324.84                 | 0.517                                      | <b>0.010</b>                               | 374.12                            | 364.32                  | 347.32                  | 0.305199                                   | <b>0.009</b>                               |

**Supplementary Table S12B. Back-transformed and pairwise comparison of weekly fetal growth biometrics across Behenic acid (22:0) tertiles in the NICHD Fetal Growth Studies-Singletons**

| G<br>W | HC, mm                            |                         |                         |                                            |                                            | BPD, mm                           |                         |                         |                                            |                                            |
|--------|-----------------------------------|-------------------------|-------------------------|--------------------------------------------|--------------------------------------------|-----------------------------------|-------------------------|-------------------------|--------------------------------------------|--------------------------------------------|
|        | <u>Back-transformed geometric</u> |                         |                         | <u>Wald test for pairwise</u>              |                                            | <u>Back-transformed geometric</u> |                         |                         | <u>Wald test for pairwise</u>              |                                            |
|        | <u>mean mm</u>                    |                         |                         | <u>comparison</u>                          |                                            | <u>mean mm</u>                    |                         |                         | <u>comparison</u>                          |                                            |
|        | 1 <sup>st</sup> tertile           | 2 <sup>nd</sup> tertile | 3 <sup>rd</sup> tertile | 2 <sup>nd</sup> vs 1 <sup>st</sup> tertile | 3 <sup>rd</sup> vs 1 <sup>st</sup> tertile | 1 <sup>st</sup> tertile           | 2 <sup>nd</sup> tertile | 3 <sup>rd</sup> tertile | 2 <sup>nd</sup> vs 1 <sup>st</sup> tertile | 3 <sup>rd</sup> vs 1 <sup>st</sup> tertile |
| 10     | 47.17                             | 53.18                   | 50.23                   | <0.001                                     | 0.075                                      | 11.46                             | 13.26                   | 12.17                   | <0.0001                                    | 0.121                                      |
| 11     | 59.39                             | 62.42                   | 61.67                   | 0.007                                      | 0.057                                      | 15.13                             | 16.16                   | 15.75                   | 0.001                                      | 0.066                                      |
| 12     | 72.41                             | 72.60                   | 73.90                   | 0.811                                      | 0.068                                      | 19.08                             | 19.31                   | 19.58                   | 0.298                                      | 0.034                                      |
| 13     | 85.82                             | 83.67                   | 86.64                   | 0.011                                      | 0.297                                      | 23.11                             | 22.65                   | 23.49                   | 0.057                                      | 0.100                                      |
| 14     | 99.23                             | 95.55                   | 99.62                   | <0.001                                     | 0.693                                      | 27.05                             | 26.11                   | 27.35                   | 0.003                                      | 0.314                                      |
| 15     | 112.38                            | 108.09                  | 112.62                  | <0.001                                     | 0.832                                      | 30.77                             | 29.64                   | 31.03                   | 0.002                                      | 0.449                                      |
| 16     | 125.08                            | 121.14                  | 125.47                  | 0.003                                      | 0.755                                      | 34.23                             | 33.19                   | 34.51                   | 0.007                                      | 0.450                                      |
| 17     | 137.36                            | 134.48                  | 138.11                  | 0.036                                      | 0.574                                      | 37.44                             | 36.71                   | 37.79                   | 0.071                                      | 0.384                                      |
| 18     | 149.37                            | 147.86                  | 150.55                  | 0.313                                      | 0.416                                      | 40.52                             | 40.19                   | 40.94                   | 0.444                                      | 0.327                                      |
| 19     | 161.35                            | 161.01                  | 162.87                  | 0.838                                      | 0.341                                      | 43.60                             | 43.60                   | 44.08                   | 0.990                                      | 0.310                                      |
| 20     | 173.29                            | 173.77                  | 175.00                  | 0.786                                      | 0.320                                      | 46.70                             | 46.92                   | 47.20                   | 0.673                                      | 0.326                                      |
| 21     | 185.11                            | 186.03                  | 186.85                  | 0.623                                      | 0.335                                      | 49.81                             | 50.14                   | 50.28                   | 0.541                                      | 0.371                                      |
| 22     | 196.75                            | 197.73                  | 198.37                  | 0.614                                      | 0.387                                      | 52.89                             | 53.23                   | 53.31                   | 0.549                                      | 0.453                                      |
| 23     | 208.14                            | 208.84                  | 209.51                  | 0.730                                      | 0.483                                      | 55.95                             | 56.20                   | 56.27                   | 0.676                                      | 0.585                                      |
| 24     | 219.23                            | 219.38                  | 220.26                  | 0.947                                      | 0.621                                      | 58.97                             | 59.05                   | 59.15                   | 0.905                                      | 0.767                                      |
| 25     | 230.00                            | 229.40                  | 230.61                  | 0.794                                      | 0.780                                      | 61.94                             | 61.79                   | 61.96                   | 0.822                                      | 0.978                                      |
| 26     | 240.43                            | 239.01                  | 240.6                   | 0.566                                      | 0.943                                      | 64.84                             | 64.44                   | 64.67                   | 0.579                                      | 0.814                                      |
| 27     | 250.51                            | 248.33                  | 250.28                  | 0.405                                      | 0.926                                      | 67.67                             | 67.03                   | 67.31                   | 0.406                                      | 0.626                                      |
| 28     | 260.26                            | 257.53                  | 259.72                  | 0.311                                      | 0.835                                      | 70.43                             | 69.61                   | 69.86                   | 0.303                                      | 0.467                                      |
| 29     | 269.66                            | 266.75                  | 268.99                  | 0.285                                      | 0.799                                      | 73.10                             | 72.20                   | 72.35                   | 0.265                                      | 0.341                                      |
| 30     | 278.64                            | 275.93                  | 278.04                  | 0.329                                      | 0.825                                      | 75.66                             | 74.79                   | 74.76                   | 0.293                                      | 0.265                                      |
| 31     | 287.08                            | 284.88                  | 286.72                  | 0.451                                      | 0.898                                      | 78.08                             | 77.34                   | 77.09                   | 0.395                                      | 0.245                                      |
| 32     | 294.89                            | 293.39                  | 294.86                  | 0.633                                      | 0.991                                      | 80.33                             | 79.79                   | 79.34                   | 0.563                                      | 0.274                                      |
| 33     | 301.96                            | 301.23                  | 302.29                  | 0.828                                      | 0.920                                      | 82.39                             | 82.09                   | 81.49                   | 0.766                                      | 0.352                                      |
| 34     | 308.19                            | 308.18                  | 308.82                  | 0.997                                      | 0.847                                      | 84.22                             | 84.18                   | 83.55                   | 0.972                                      | 0.501                                      |
| 35     | 313.55                            | 313.98                  | 314.29                  | 0.900                                      | 0.828                                      | 85.81                             | 86.00                   | 85.50                   | 0.850                                      | 0.763                                      |
| 36     | 318.26                            | 318.67                  | 318.49                  | 0.907                                      | 0.950                                      | 87.20                             | 87.53                   | 87.22                   | 0.759                                      | 0.992                                      |
| 37     | 322.57                            | 322.51                  | 321.24                  | 0.988                                      | 0.738                                      | 88.46                             | 88.80                   | 88.46                   | 0.771                                      | 0.999                                      |
| 38     | 326.76                            | 325.78                  | 322.39                  | 0.807                                      | 0.274                                      | 89.65                             | 89.84                   | 89.00                   | 0.876                                      | 0.594                                      |
| 39     | 331.14                            | 328.79                  | 321.79                  | 0.582                                      | 0.026                                      | 90.84                             | 90.68                   | 88.6                    | 0.907                                      | 0.081                                      |
| 40     | 336.02                            | 331.85                  | 319.31                  | 0.512                                      | 0.013                                      | 92.08                             | 91.36                   | 87.05                   | 0.711                                      | 0.015                                      |

**Supplementary Table S13A. Back-transformed and pairwise comparison of weekly fetal growth biometrics across sum of very-long-even-chain saturated fatty acids tertiles in the NICHD Fetal Growth Studies-Singletons**

| G<br>W | EFW, g                                 |                         |                         |                                            |                                            | AC, mm                            |                         |                         |                                            |                                            |
|--------|----------------------------------------|-------------------------|-------------------------|--------------------------------------------|--------------------------------------------|-----------------------------------|-------------------------|-------------------------|--------------------------------------------|--------------------------------------------|
|        | <u>Back-transformed geometric mean</u> |                         |                         | <u>Wald test for pairwise</u>              |                                            | <u>Back-transformed geometric</u> |                         |                         | <u>Wald test for pairwise</u>              |                                            |
|        | gram                                   |                         |                         | <u>comparison</u>                          |                                            | mean mm                           |                         |                         | <u>comparison</u>                          |                                            |
|        | 1 <sup>st</sup> tertile                | 2 <sup>nd</sup> tertile | 3 <sup>rd</sup> tertile | 2 <sup>nd</sup> vs 1 <sup>st</sup> tertile | 3 <sup>rd</sup> vs 1 <sup>st</sup> tertile | 1 <sup>st</sup> tertile           | 2 <sup>nd</sup> tertile | 3 <sup>rd</sup> tertile | 2 <sup>nd</sup> vs 1 <sup>st</sup> tertile | 3 <sup>rd</sup> vs 1 <sup>st</sup> tertile |
| 10     | 32.15                                  | 35.36                   | 37.55                   | 0.059                                      | <b>0.027</b>                               | 38.31                             | 42.46                   | 36.83                   | <b>0.028</b>                               | 0.417                                      |
| 11     | 42.21                                  | 43.57                   | 46.46                   | 0.301                                      | <b>0.013</b>                               | 47.63                             | 49.16                   | 46.85                   | 0.199                                      | 0.517                                      |
| 12     | 55.08                                  | 54.39                   | 58.01                   | 0.550                                      | <b>0.012</b>                               | 57.95                             | 56.96                   | 57.72                   | 0.141                                      | 0.743                                      |
| 13     | 71.38                                  | 68.50                   | 72.90                   | <b>0.038</b>                               | 0.204                                      | 69.12                             | 65.95                   | 69.13                   | <b>&lt;0.0001</b>                          | 0.983                                      |
| 14     | 91.80                                  | 86.73                   | 91.92                   | <b>0.007</b>                               | 0.945                                      | 80.94                             | 76.12                   | 80.79                   | <b>&lt;0.0001</b>                          | 0.868                                      |
| 15     | 117.10                                 | 110.00                  | 115.94                  | <b>0.003</b>                               | 0.604                                      | 93.22                             | 87.41                   | 92.46                   | <b>&lt;0.0001</b>                          | 0.490                                      |
| 16     | 148.04                                 | 139.21                  | 145.84                  | <b>0.004</b>                               | 0.423                                      | 105.74                            | 99.66                   | 104.02                  | <b>&lt;0.0001</b>                          | 0.135                                      |
| 17     | 185.37                                 | 175.16                  | 182.44                  | <b>0.006</b>                               | 0.381                                      | 118.34                            | 112.58                  | 115.44                  | <b>&lt;0.0001</b>                          | <b>0.016</b>                               |
| 18     | 229.76                                 | 218.29                  | 226.29                  | <b>0.014</b>                               | 0.409                                      | 130.87                            | 125.74                  | 126.85                  | <b>&lt;0.0001</b>                          | <b>0.002</b>                               |
| 19     | 281.72                                 | 268.68                  | 277.68                  | <b>0.026</b>                               | 0.443                                      | 143.22                            | 138.67                  | 138.33                  | <b>0.001</b>                               | <b>0.001</b>                               |
| 20     | 341.83                                 | 326.67                  | 337.18                  | <b>0.036</b>                               | 0.466                                      | 155.30                            | 151.12                  | 149.81                  | <b>0.006</b>                               | <b>&lt;0.001</b>                           |
| 21     | 410.73                                 | 392.74                  | 405.41                  | <b>0.041</b>                               | 0.480                                      | 167.01                            | 162.97                  | 161.23                  | <b>0.010</b>                               | <b>&lt;0.001</b>                           |
| 22     | 489.00                                 | 467.37                  | 482.98                  | <b>0.041</b>                               | 0.490                                      | 178.32                            | 174.17                  | 172.53                  | <b>0.010</b>                               | <b>&lt;0.001</b>                           |
| 23     | 577.23                                 | 551.07                  | 570.45                  | <b>0.039</b>                               | 0.505                                      | 189.22                            | 184.75                  | 183.68                  | <b>0.007</b>                               | <b>0.001</b>                               |
| 24     | 676.03                                 | 644.44                  | 668.43                  | <b>0.036</b>                               | 0.528                                      | 199.75                            | 194.77                  | 194.68                  | <b>0.004</b>                               | <b>0.005</b>                               |
| 25     | 786.01                                 | 748.21                  | 777.52                  | <b>0.035</b>                               | 0.556                                      | 210.01                            | 204.38                  | 205.55                  | <b>0.003</b>                               | <b>0.022</b>                               |
| 26     | 907.86                                 | 863.30                  | 898.38                  | <b>0.035</b>                               | 0.582                                      | 220.10                            | 213.79                  | 216.31                  | <b>0.002</b>                               | 0.075                                      |
| 27     | 1042.34                                | 990.94                  | 1031.75                 | <b>0.038</b>                               | 0.599                                      | 230.19                            | 223.23                  | 227.03                  | <b>0.001</b>                               | 0.159                                      |
| 28     | 1190.37                                | 1132.68                 | 1178.51                 | <b>0.047</b>                               | 0.603                                      | 240.50                            | 233.02                  | 237.79                  | <b>&lt;0.001</b>                           | 0.230                                      |
| 29     | 1352.79                                | 1290.15                 | 1339.53                 | 0.059                                      | 0.599                                      | 251.19                            | 243.46                  | 248.68                  | <b>&lt;0.001</b>                           | 0.245                                      |
| 30     | 1529.36                                | 1463.47                 | 1514.55                 | 0.085                                      | 0.599                                      | 262.19                            | 254.52                  | 259.65                  | <b>&lt;0.001</b>                           | 0.232                                      |
| 31     | 1719.07                                | 1651.74                 | 1702.34                 | 0.126                                      | 0.607                                      | 273.34                            | 266.09                  | 270.61                  | <b>0.001</b>                               | 0.233                                      |
| 32     | 1920.25                                | 1853.13                 | 1900.87                 | 0.185                                      | 0.613                                      | 284.46                            | 278.00                  | 281.43                  | <b>0.010</b>                               | 0.244                                      |
| 33     | 2130.45                                | 2064.81                 | 2107.28                 | 0.254                                      | 0.598                                      | 295.33                            | 290.07                  | 291.99                  | 0.057                                      | 0.239                                      |
| 34     | 2346.44                                | 2282.76                 | 2317.78                 | 0.324                                      | 0.554                                      | 305.71                            | 302.08                  | 302.15                  | 0.191                                      | 0.211                                      |
| 35     | 2564.55                                | 2502.46                 | 2527.54                 | 0.388                                      | 0.487                                      | 315.44                            | 313.79                  | 311.75                  | 0.533                                      | 0.195                                      |
| 36     | 2782.18                                | 2726.16                 | 2730.22                 | 0.485                                      | 0.404                                      | 324.92                            | 325.05                  | 320.68                  | 0.964                                      | 0.207                                      |
| 37     | 2997.14                                | 2962.55                 | 2918.28                 | 0.699                                      | 0.275                                      | 334.77                            | 335.87                  | 328.80                  | 0.753                                      | 0.132                                      |
| 38     | 3207.39                                | 3223.83                 | 3083.48                 | 0.868                                      | 0.104                                      | 345.71                            | 346.24                  | 336.02                  | 0.884                                      | <b>0.014</b>                               |
| 39     | 3411.10                                | 3526.40                 | 3217.33                 | 0.296                                      | <b>0.019</b>                               | 358.52                            | 356.17                  | 342.21                  | 0.573                                      | <b>&lt;0.001</b>                           |
| 40     | 3606.71                                | 3892.30                 | 3311.66                 | <b>0.037</b>                               | <b>0.035</b>                               | 374.15                            | 365.68                  | 347.29                  | 0.324                                      | <b>0.0038</b>                              |

**Supplementary Table S13B. Back-transformed and pairwise comparison of weekly fetal growth biometrics across sum of very-long-even-chain saturated fatty acids tertiles in the NICHD Fetal Growth Studies-Singleton**

| G<br>W | HC, mm                            |                         |                         |                                            |                                            | BPD, mm                           |                         |                         |                                            |                                            |
|--------|-----------------------------------|-------------------------|-------------------------|--------------------------------------------|--------------------------------------------|-----------------------------------|-------------------------|-------------------------|--------------------------------------------|--------------------------------------------|
|        | <u>Back-transformed geometric</u> |                         |                         | <u>Wald test for pairwise</u>              |                                            | <u>Back-transformed geometric</u> |                         |                         | <u>Wald test for pairwise</u>              |                                            |
|        | <u>mean mm</u>                    |                         |                         | <u>comparison</u>                          |                                            | <u>mean mm</u>                    |                         |                         | <u>comparison</u>                          |                                            |
|        | 1 <sup>st</sup> tertile           | 2 <sup>nd</sup> tertile | 3 <sup>rd</sup> tertile | 2 <sup>nd</sup> vs 1 <sup>st</sup> tertile | 3 <sup>rd</sup> vs 1 <sup>st</sup> tertile | 1 <sup>st</sup> tertile           | 2 <sup>nd</sup> tertile | 3 <sup>rd</sup> tertile | 2 <sup>nd</sup> vs 1 <sup>st</sup> tertile | 3 <sup>rd</sup> vs 1 <sup>st</sup> tertile |
| 10     | 51.89                             | 51.94                   | 48.6                    | 0.976                                      | 0.071                                      | 13.45                             | 12.75                   | 11.8                    | 0.180                                      | <b>&lt;0.001</b>                           |
| 11     | 62.43                             | 61.78                   | 60.51                   | 0.585                                      | 0.110                                      | 16.45                             | 15.87                   | 15.47                   | 0.092                                      | <b>0.004</b>                               |
| 12     | 73.79                             | 72.48                   | 73.22                   | 0.059                                      | 0.418                                      | 19.68                             | 19.22                   | 19.40                   | <b>0.025</b>                               | 0.172                                      |
| 13     | 85.82                             | 83.94                   | 86.35                   | <b>0.005</b>                               | 0.416                                      | 23.08                             | 22.72                   | 23.40                   | 0.064                                      | 0.102                                      |
| 14     | 98.32                             | 96.04                   | 99.58                   | <b>0.011</b>                               | 0.148                                      | 26.60                             | 26.26                   | 27.32                   | 0.213                                      | <b>0.005</b>                               |
| 15     | 111.12                            | 108.61                  | 112.66                  | <b>0.016</b>                               | 0.139                                      | 30.16                             | 29.79                   | 31.03                   | 0.249                                      | <b>0.005</b>                               |
| 16     | 124.07                            | 121.48                  | 125.42                  | <b>0.018</b>                               | 0.220                                      | 33.72                             | 33.26                   | 34.49                   | 0.165                                      | <b>0.019</b>                               |
| 17     | 137.03                            | 134.48                  | 137.83                  | <b>0.023</b>                               | 0.479                                      | 37.24                             | 36.64                   | 37.72                   | 0.072                                      | 0.161                                      |
| 18     | 149.91                            | 147.44                  | 150.02                  | <b>0.041</b>                               | 0.932                                      | 40.71                             | 39.93                   | 40.82                   | <b>0.032</b>                               | 0.777                                      |
| 19     | 162.67                            | 160.19                  | 162.15                  | 0.066                                      | 0.701                                      | 44.14                             | 43.17                   | 43.92                   | <b>0.017</b>                               | 0.595                                      |
| 20     | 175.22                            | 172.62                  | 174.18                  | 0.073                                      | 0.481                                      | 47.50                             | 46.35                   | 47.03                   | <b>0.008</b>                               | 0.293                                      |
| 21     | 187.46                            | 184.62                  | 186.05                  | 0.060                                      | 0.356                                      | 50.77                             | 49.44                   | 50.14                   | <b>0.003</b>                               | 0.170                                      |
| 22     | 199.33                            | 196.13                  | 197.68                  | <b>0.039</b>                               | 0.289                                      | 53.93                             | 52.44                   | 53.22                   | <b>&lt;0.001</b>                           | 0.127                                      |
| 23     | 210.77                            | 207.13                  | 209.00                  | <b>0.023</b>                               | 0.271                                      | 56.98                             | 55.34                   | 56.25                   | <b>&lt;0.001</b>                           | 0.128                                      |
| 24     | 221.77                            | 217.61                  | 219.98                  | <b>0.014</b>                               | 0.293                                      | 59.92                             | 58.15                   | 59.21                   | <b>&lt;0.001</b>                           | 0.166                                      |
| 25     | 232.34                            | 227.62                  | 230.60                  | <b>0.010</b>                               | 0.346                                      | 62.75                             | 60.88                   | 62.10                   | <b>&lt;0.001</b>                           | 0.236                                      |
| 26     | 242.50                            | 237.23                  | 240.85                  | <b>0.008</b>                               | 0.407                                      | 65.49                             | 63.54                   | 64.88                   | <b>&lt;0.001</b>                           | 0.309                                      |
| 27     | 252.33                            | 246.54                  | 250.73                  | <b>0.006</b>                               | 0.448                                      | 68.16                             | 66.16                   | 67.56                   | <b>0.002</b>                               | 0.338                                      |
| 28     | 261.89                            | 255.68                  | 260.26                  | <b>0.004</b>                               | 0.446                                      | 70.80                             | 68.78                   | 70.11                   | <b>0.002</b>                               | 0.284                                      |
| 29     | 271.27                            | 264.77                  | 269.49                  | <b>0.002</b>                               | 0.395                                      | 73.41                             | 71.41                   | 72.53                   | <b>0.001</b>                               | 0.161                                      |
| 30     | 280.36                            | 273.72                  | 278.36                  | <b>0.001</b>                               | 0.338                                      | 75.99                             | 74.03                   | 74.83                   | <b>0.002</b>                               | 0.068                                      |
| 31     | 289.02                            | 282.38                  | 286.78                  | <b>0.003</b>                               | 0.315                                      | 78.47                             | 76.60                   | 77.03                   | <b>0.006</b>                               | <b>0.034</b>                               |
| 32     | 297.10                            | 290.61                  | 294.65                  | <b>0.008</b>                               | 0.320                                      | 80.81                             | 79.05                   | 79.16                   | <b>0.019</b>                               | <b>0.027</b>                               |
| 33     | 304.43                            | 298.23                  | 301.89                  | <b>0.018</b>                               | 0.334                                      | 82.96                             | 81.34                   | 81.25                   | <b>0.045</b>                               | <b>0.033</b>                               |
| 34     | 310.84                            | 305.06                  | 308.39                  | <b>0.029</b>                               | 0.353                                      | 84.85                             | 83.39                   | 83.33                   | 0.073                                      | 0.060                                      |
| 35     | 316.24                            | 310.96                  | 314.04                  | <b>0.040</b>                               | 0.407                                      | 86.45                             | 85.17                   | 85.41                   | 0.107                                      | 0.205                                      |
| 36     | 320.83                            | 315.98                  | 318.56                  | 0.082                                      | 0.452                                      | 87.80                             | 86.69                   | 87.30                   | 0.197                                      | 0.597                                      |
| 37     | 324.90                            | 320.34                  | 321.62                  | 0.147                                      | 0.337                                      | 88.94                             | 88.02                   | 88.71                   | 0.340                                      | 0.826                                      |
| 38     | 328.76                            | 324.27                  | 322.90                  | 0.168                                      | 0.083                                      | 89.96                             | 89.27                   | 89.35                   | 0.488                                      | 0.553                                      |
| 39     | 332.74                            | 328.04                  | 322.09                  | 0.196                                      | <b>0.003</b>                               | 90.92                             | 90.51                   | 88.91                   | 0.717                                      | 0.070                                      |
| 40     | 337.20                            | 331.89                  | 318.91                  | 0.415                                      | <b>0.007</b>                               | 91.89                             | 91.86                   | 87.15                   | 0.990                                      | <b>0.020</b>                               |

**Supplementary Table S14. Association between individual SFA and fetal growth throughout between 10-40 weeks gestation using cubic spline model with gestational weeks after adjusting for maternal family history of diabetes**

|                                                          | Estimated Fetal Weight,<br>g                                                                                                                       | Abdominal circumference,<br>mm                 | Femur length, mm                               | Head circumference, mm                         | Biparietal diameter, mm                        | HC/AC ratio                                    |
|----------------------------------------------------------|----------------------------------------------------------------------------------------------------------------------------------------------------|------------------------------------------------|------------------------------------------------|------------------------------------------------|------------------------------------------------|------------------------------------------------|
| SFAs in tertiles                                         | Globa test (after adjusting for maternal ge, ethnicity/race, nulliparity, pre-pregnacy body mass index and fetal sex) with interaction term SFA*GA |                                                |                                                |                                                |                                                |                                                |
|                                                          | Likelihood ratio with<br>Bonferroni correction                                                                                                     | Likelihood ratio with<br>Bonferroni correction | Likelihood ratio with<br>Bonferroni correction | Likelihood ratio with<br>Bonferroni correction | Likelihood ratio with<br>Bonferroni correction | Likelihood ratio with<br>Bonferroni correction |
| Myristic acid (14:0)                                     | <0.00001                                                                                                                                           | <0.00001                                       | 0.011                                          | <0.0001                                        | <0.00001                                       | <0.00001                                       |
| Pentadecanoic acid (15:0)                                | <0.00001                                                                                                                                           | <0.00001                                       | 0.005                                          | <0.00001                                       | <0.00001                                       | <0.00001                                       |
| Palmitic acid (16:0)                                     | 0.171                                                                                                                                              | 0.021                                          | 1.00                                           | 1.00                                           | 1.00                                           | <0.00001                                       |
| Heptadecanoic acid (17:0)                                | <0.00001                                                                                                                                           | <0.001                                         | <0.00001                                       | <0.00001                                       | <0.00001                                       | 1.00                                           |
| Stearic acid (18:0)                                      | <0.0001                                                                                                                                            | <0.00001                                       | <0.00001                                       | <0.00001                                       | <0.00001                                       | <0.00001                                       |
| Arachidic acid (20:0)                                    | 0.129                                                                                                                                              | 1.00                                           | 0.002                                          | 0.005                                          | <0.00001                                       | 0.019                                          |
| Behenic acid (22:0)                                      | <0.00001                                                                                                                                           | <0.00001                                       | 0.226                                          | <0.00001                                       | <0.00001                                       | <0.00001                                       |
| Lignoceric acid (24:0)                                   | <0.00001                                                                                                                                           | <0.00001                                       | 0.031                                          | <0.00001                                       | <0.00001                                       | <0.00001                                       |
| Sum of even-chain SFAs<br>(14:0 + 16:0 + 18:0)           | 1.00                                                                                                                                               | <0.00001                                       | <0.00001                                       | <0.00001                                       | <0.00001                                       | 0.0001                                         |
| Sum of odd-chain SFAs<br>(15:0 + 17:0)                   | <0.00001                                                                                                                                           | 1.00                                           | 0.0039                                         | <0.00001                                       | <0.00001                                       | 0.178                                          |
| Sum of very-long-even-chain SFAs<br>(20:0 + 22:0 + 24:0) | <0.00001                                                                                                                                           | <0.00001                                       | 0.073                                          | <0.00001                                       | <0.00001                                       | <0.00001                                       |

Abbreviations: GA, gestational age, SFA, saturated fatty acids; HC/AC ratio, head circumference/abdominal circumference ratio.

**Supplementary Table S15. Association between individual SFA and fetal growth throughout between 10-40 weeks gestation using cubic spline model with gestational weeks after adjusting for maternal random glucose level at visit 0**

|                                                          | Estimated Fetal Weight,<br>g                                                                                                                       | Abdominal circumference,<br>mm                 | Femur length, mm                               | Head circumference, mm                         | Biparietal diameter, mm                        | HC/AC ratio                                    |
|----------------------------------------------------------|----------------------------------------------------------------------------------------------------------------------------------------------------|------------------------------------------------|------------------------------------------------|------------------------------------------------|------------------------------------------------|------------------------------------------------|
| SFAs in tertiles                                         | Globa test (after adjusting for maternal ge, ethnicity/race, nulliparity, pre-pregnacy body mass index and fetal sex) with interaction term SFA*GA |                                                |                                                |                                                |                                                |                                                |
|                                                          | Likelihood ratio with<br>Bonferroni correction                                                                                                     | Likelihood ratio with<br>Bonferroni correction | Likelihood ratio with<br>Bonferroni correction | Likelihood ratio with<br>Bonferroni correction | Likelihood ratio with<br>Bonferroni correction | Likelihood ratio with<br>Bonferroni correction |
| Myristic acid (14:0)                                     | <0.00001                                                                                                                                           | <0.00001                                       | 0.012                                          | <0.00001                                       | <0.00001                                       | <0.00001                                       |
| Pentadecanoic acid (15:0)                                | <0.00001                                                                                                                                           | <0.00001                                       | 0.005                                          | <0.00001                                       | <0.00001                                       | <0.00001                                       |
| Palmitic acid (16:0)                                     | 0.206                                                                                                                                              | 0.041                                          | 1.00                                           | 1.00                                           | 1.00                                           | <0.00001                                       |
| Heptadecanoic acid (17:0)                                | <0.00001                                                                                                                                           | 0.001                                          | <0.00001                                       | <0.00001                                       | <0.00001                                       | 1.00                                           |
| Stearic acid (18:0)                                      | <0.00001                                                                                                                                           | <0.00001                                       | <0.00001                                       | <0.00001                                       | <0.00001                                       | <0.00001                                       |
| Arachidic acid (20:0)                                    | 0.140                                                                                                                                              | 0.521                                          | 0.002                                          | <0.001                                         | <0.00001                                       | 0.026                                          |
| Behenic acid (22:0)                                      | <0.00001                                                                                                                                           | <0.00001                                       | 0.2160                                         | <0.00001                                       | <0.00001                                       | <0.00001                                       |
| Lignoceric acid (24:0)                                   | <0.00001                                                                                                                                           | <0.00001                                       | 0.030                                          | <0.00001                                       | <0.00001                                       | <0.00001                                       |
| Sum of even-chain SFAs<br>(14:0 + 16:0 + 18:0)           | <0.00001                                                                                                                                           | <0.00001                                       | <0.00001                                       | <0.00001                                       | <0.00001                                       | <0.00001                                       |
| Sum of odd-chain SFAs<br>(15:0 + 17:0)                   | <0.00001                                                                                                                                           | 1.00                                           | 0.004                                          | <0.00001                                       | <0.00001                                       | 0.119                                          |
| Sum of very-long-even-chain SFAs<br>(20:0 + 22:0 + 24:0) | <0.00001                                                                                                                                           | <0.00001                                       | 0.061                                          | <0.00001                                       | <0.00001                                       | <0.00001                                       |

Abbreviations: GA, gestational age, SFA, saturated fatty acids; HC/AC ratio, head circumference/abdominal circumference ratio.



Supplementary Table S16. Association between individual SFA and fetal growth throughout between 10-40 weeks gestation using cubic spline model with gestational weeks after adjusting for maternal total cholesterol level at visit 0

|                                                          | Estimated Fetal Weight,<br>g                                                                                                                       | Abdominal circumference,<br>mm                 | Femur length, mm                               | Head circumference, mm                         | Biparietal diameter, mm                        | HC/AC ratio                                    |
|----------------------------------------------------------|----------------------------------------------------------------------------------------------------------------------------------------------------|------------------------------------------------|------------------------------------------------|------------------------------------------------|------------------------------------------------|------------------------------------------------|
| SFAs in tertiles                                         | Globa test (after adjusting for maternal ge, ethnicity/race, nulliparity, pre-pregnacy body mass index and fetal sex) with interaction term SFA*GA |                                                |                                                |                                                |                                                |                                                |
|                                                          | Likelihood ratio with<br>Bonferroni correction                                                                                                     | Likelihood ratio with<br>Bonferroni correction | Likelihood ratio with<br>Bonferroni correction | Likelihood ratio with<br>Bonferroni correction | Likelihood ratio with<br>Bonferroni correction | Likelihood ratio with<br>Bonferroni correction |
| Myristic acid (14:0)                                     | <0.00001                                                                                                                                           | <0.00001                                       | 0.013                                          | <0.00001                                       | <0.00001                                       | <0.00001                                       |
| Pentadecanoic acid (15:0)                                | <0.00001                                                                                                                                           | <0.00001                                       | 0.005                                          | <0.00001                                       | <0.00001                                       | <0.00001                                       |
| Palmitic acid (16:0)                                     | 0.202                                                                                                                                              | 0.016                                          | 1.00                                           | 1.00                                           | 1.00                                           | <0.00001                                       |
| Heptadecanoic acid (17:0)                                | <0.00001                                                                                                                                           | 0.003                                          | <0.00001                                       | <0.00001                                       | <0.00001                                       | 0.587                                          |
| Stearic acid (18:0)                                      | <0.00001                                                                                                                                           | <0.00001                                       | <0.00001                                       | <0.00001                                       | <0.00001                                       | <0.00001                                       |
| Arachidic acid (20:0)                                    | 0.131                                                                                                                                              | 0.600                                          | 0.002                                          | <0.001                                         | <0.00001                                       | 0.003                                          |
| Behenic acid (22:0)                                      | <0.00001                                                                                                                                           | <0.00001                                       | 0.230                                          | <0.00001                                       | <0.00001                                       | <0.00001                                       |
| Lignoceric acid (24:0)                                   | <0.00001                                                                                                                                           | <0.00001                                       | 0.027                                          | <0.00001                                       | <0.00001                                       | <0.00001                                       |
| Sum of even-chain SFAs<br>(14:0 + 16:0 + 18:0)           | <0.00001                                                                                                                                           | <0.00001                                       | <0.00001                                       | <0.00001                                       | <0.00001                                       | <0.00001                                       |
| Sum of odd-chain SFAs<br>(15:0 + 17:0)                   | <0.00001                                                                                                                                           | 1.00                                           | 0.004                                          | <0.00001                                       | <0.00001                                       | 0.009                                          |
| Sum of very-long-even-chain SFAs<br>(20:0 + 22:0 + 24:0) | <0.00001                                                                                                                                           | <0.00001                                       | 0.066                                          | <0.00001                                       | <0.00001                                       | <0.00001                                       |

Abbreviations: GA, gestational age, SFA, saturated fatty acids; HC/AC ratio, head circumference/abdominal circumference ratio.

**Supplementary Table S17. Association between individual SFA and fetal growth throughout between 10-40 weeks gestation using cubic spline model with gestational weeks after adjusting for subgroup SFAs at visit 0**

|                                                          | Estimated Fetal Weight,<br>g                                                                                                                       | Abdominal circumference,<br>mm                 | Femur length, mm                               | Head circumference, mm                         | Biparietal diameter, mm                        | HC/AC ratio                                    |
|----------------------------------------------------------|----------------------------------------------------------------------------------------------------------------------------------------------------|------------------------------------------------|------------------------------------------------|------------------------------------------------|------------------------------------------------|------------------------------------------------|
| SFAs in tertiles                                         | Globa test (after adjusting for maternal ge, ethnicity/race, nulliparity, pre-pregnacy body mass index and fetal sex) with interaction term SFA*GA |                                                |                                                |                                                |                                                |                                                |
|                                                          | Likelihood ratio with<br>Bonferroni correction                                                                                                     | Likelihood ratio with<br>Bonferroni correction | Likelihood ratio with<br>Bonferroni correction | Likelihood ratio with<br>Bonferroni correction | Likelihood ratio with<br>Bonferroni correction | Likelihood ratio with<br>Bonferroni correction |
| Myristic acid (14:0)                                     | 0.99                                                                                                                                               | 0.005                                          | 0.007                                          | <0.00001                                       | <0.00001                                       | <0.00001                                       |
| Pentadecanoic acid (15:0)                                | <0.00001                                                                                                                                           | <0.00001                                       | 0.003                                          | <0.00001                                       | <0.00001                                       | <0.00001                                       |
| Palmitic acid (16:0)                                     | 0.258                                                                                                                                              | 0.005                                          | 0.99                                           | 0.99                                           | 0.99                                           | <0.00001                                       |
| Heptadecanoic acid (17:0)                                | <0.00001                                                                                                                                           | <0.00001                                       | <0.00001                                       | <0.00001                                       | <0.00001                                       | 0.550                                          |
| Stearic acid (18:0)                                      | <0.00001                                                                                                                                           | <0.00001                                       | <0.00001                                       | <0.00001                                       | <0.00001                                       | <0.00001                                       |
| Arachidic acid (20:0)                                    | 0.99                                                                                                                                               | 0.99                                           | 0.0004                                         | 0.037                                          | <0.00001                                       | 0.020                                          |
| Behenic acid (22:0)                                      | 0.124                                                                                                                                              | <0.00001                                       | 0.058                                          | <0.00001                                       | <0.00001                                       | <0.00001                                       |
| Lignoceric acid (24:0)                                   | <0.00001                                                                                                                                           | <0.00001                                       | 0.022                                          | <0.00001                                       | <0.00001                                       | <0.00001                                       |
| Sum of even-chain SFAs<br>(14:0 + 16:0 + 18:0)           | 0.99                                                                                                                                               | 0.99                                           | <0.00001                                       | <0.00001                                       | 0.0006                                         | <0.00001                                       |
| Sum of odd-chain SFAs<br>(15:0 + 17:0)                   | <0.00001                                                                                                                                           | <0.00001                                       | 0.001                                          | <0.00001                                       | <0.00001                                       | 0.071                                          |
| Sum of very-long-even-chain SFAs<br>(20:0 + 22:0 + 24:0) | <0.00001                                                                                                                                           | <0.00001                                       | 0.007                                          | <0.00001                                       | <0.00001                                       | <0.00001                                       |

Abbreviations: GA, gestational age; SFA, saturated fatty acids; HC/AC ratio, head circumference/abdominal circumference ratio.
